1 **Bone marrow-on-a-chip: Emulating the human bone marrow**

2

3 Stefan Sieber<sup>1</sup>, Annika Winter<sup>2</sup>, Johanna Wachsmuth<sup>1</sup>, Rhiannon David<sup>5</sup> Maria Stecklum<sup>3</sup>, Lars  
4 Hellmeyer<sup>4</sup>, Lorna Ewart<sup>5</sup>, Uwe Marx<sup>3</sup>, Roland Lauster<sup>1</sup>, Mark Rosowski<sup>1,\*</sup>

5

6 <sup>1</sup> Technische Universität Berlin, Institute of Biotechnology, Department Medical Biotechnology,  
7 Gustav-Meyer-Allee 25, Berlin, DE

8 <sup>2</sup> TissUse GmbH, Oudenarder Str. 16, Berlin, DE

9 <sup>3</sup> EPO Experimentelle Pharmakologie & Onkologie Berlin-Buch GmbH, Robert-Rössle-Straße  
10 10, Berlin, DE

11 <sup>4</sup> Vivantes Klinikum im Friedrichshain, Landsberger Allee 49, Berlin, DE

12 <sup>5</sup> AstraZeneca, Cambridge, UK

13

14

15

16 \* corresponding author

17

18

19

20

1 **Abstract**

2 Multipotent hematopoietic stem and progenitor cells HPSC reside in specialized stem cell niches  
3 within the bone marrow, that provide a suitable microenvironment for lifelong maintenance of  
4 the stem cells. Meaningful in vitro models recapitulating the in vivo stem cell niche biology can  
5 be employed for both basic research as well as for applied sciences and represent a powerful tool  
6 to reduce animal tests in preclinical studies. Recently we published the generation of an in vitro  
7 bone marrow niche model, capable of long-term cultivation of HSC based on an organ-on-a-chip  
8 platform. This study provides a detailed analysis of the 3D culture system including matrix  
9 environment analysis by SEM, transcriptome analysis and system intrinsic differentiation  
10 induction. Furthermore, the bone marrow on a chip model can serve to multiply and harvest  
11 HSPC, since repeated cell removal not compromised the functionality of the culture system. The  
12 prolongation of the culture time to 8 weeks demonstrate the capacity to apply the model in  
13 repeated drug testing experiments. The quality of the presented system is emphasized by the  
14 differentiation capacity of long-term cultivated HSPC in vitro and in vivo. Transplanted human  
15 HSCP migrated actively into the bone marrow of irradiated mice and contributed to the long-term  
16 reconstitution of the hematopoietic system after four and eight weeks of in vitro cultivation.

17 The introduced system offers a multitude of possible applications to address a broad spectrum of  
18 questions regarding HSPC, the corresponding bone marrow niche biology, and pathological  
19 aberrations.

20

## 1 **Introduction**

2 In 1978, Schofield introduced the concept of a hematopoietic stem cell niche in the bone marrow  
3 capable of harboring native HSCs (Schofield, 1978). Since then, intensive research has revealed  
4 its crucial role in self-renewal, apoptosis, differentiation, quiescence, migration and immune  
5 privilege of HSCs (Morrison and Scadden, 2014). The HSC niche is a complex structure in the  
6 trabecular region of the bone. It is composed of multiple cell types, ECM and secreted factors  
7 which promote HSC maintenance, localization, and differentiation (Lilly et al., 2011). Various  
8 publications have pointed out the significance of direct cell-to-cell contact by ‘partner cells’ for  
9 the preservation of HSCs within their niche (Arai and Suda, 2007; Lilly et al., 2011). Distinct  
10 bone marrow stromal cells, besides endothelial cells, are assumed to be essential supporting cells  
11 for HSC preservation (Morrison and Scadden, 2014). Mesenchymal stromal cells (MSCs)  
12 expressing markers including CXCL12 and Nestin have been shown to provide factors that  
13 promote HSC maintenance (Yu and Scadden, 2016). Although the identification and  
14 characterization of the different MSC subtypes are still incomplete, various studies indicate that  
15 MSCs are an essential component for the maintenance of HSCs in the bone marrow niche (Yu  
16 and Scadden, 2016). The control of sustainment, mobilization and guided differentiation of  
17 HSPCs in the bone marrow niche has been a subject of considerable interest in recent times.

18 In our present day, animals are commonly used for the testing of emerging drugs. Apart from  
19 ethical considerations, this practice contains many downsides. Among these are the unreliable  
20 test results due to species-specific differences in rodent models. Concerning the bone marrow,  
21 these include among others the different set of surface markers being expressed on HSCs or the  
22 actual site of hematopoiesis which in human mostly takes place in the axial skeleton whereas all  
23 bones support hematopoiesis in mice (Yu and Scadden, 2016). It has been reported that less than

1 50% of animal tests predict human response accurately and 92% of new drugs, successful in  
2 animal test systems, fail in clinical trials (Hackam, D.G., and Redelmeier, 2006; Perel et al.,  
3 2007). Due to the high rate of failure in clinical trials and the associated high costs, the  
4 development of drugs with higher specificity and efficacy to treat various diseases is significantly  
5 delayed. To overcome this problem innovative *in vitro* 3D culture models are needed. In 2012,  
6 Sharma et al. presented a 3D hydrogel-based MSC HSPC co-culture system capable of keeping  
7 HSC in a quiescent state over seven days of culture. They attributed this to the formation of a  
8 hypoxia-gradient and interaction with the MSCs. Furthermore, Di Maggio et al. cultured freshly  
9 isolated nucleated cells of the human bone marrow on a hydroxyapatite scaffold in a perfused  
10 system for three weeks. Subsequently, HSPCs were successfully cultured in this scaffold for one  
11 week (Di Maggio et al., 2011; Sharma et al., 2012; Walasek et al., 2012). Concerning a bone  
12 marrow-on-a-chip, in 2014, Torisawa et al. introduced a bone marrow organoid which was  
13 engineered *in vivo* in a mouse employing murine hematopoietic stem cells. This construct was  
14 subsequently transferred to a microfluidic device and cultured for one week. (Kim et al., 2015;  
15 Torisawa et al., 2014). Unfortunately, no model was able to mimic the human hematopoietic stem  
16 cell niche meaning the continued sustainment of primitive HSCs while simultaneously allowing  
17 various hematopoietic populations to differentiate into their respective progeny.

18 In a preceding publication, we presented a proof-of-principle of a novel *in vitro* bone marrow  
19 model which utilizes a scaffold mimicking the structure and surface properties of the cancellous  
20 bone microstructure, thus, facilitating unobstructed interaction between the bone marrow-derived  
21 MSCs and umbilical cord-derived HSPCs (Sieber et al., 2018). The whole model is placed in a  
22 microfluidic device enabling the generation of different niches as well as the co-culture with  
23 other *in vitro* organ models. In this publication, by among others providing Illumina  
24 transcriptome analysis, long-term cultivation capacity and *in vivo* testing data, we are able to

1 prove the functionality and robustness of this versatile pure *in vitro* bone marrow model, thereby  
2 exhibiting its vast potential. The here presented model demonstrates for the first time the  
3 successful long-term culture of functional multipotent HSCs in a dynamic environment for at  
4 least eight weeks. The model surpasses all previously presented 3D bone marrow models in  
5 culturing time of HSCs as well as in mimicking the *in vivo* environment (Kim et al., 2015).  
6 Predestining it as a model for sophisticated *in vitro* drug testing, thus, serving as an alternative to  
7 animal testing.

8

## 9 **Results**

10 In this bone marrow model, we rebuild this environment in a hydroxyapatite-coated zirconium  
11 oxide scaffold with the intention of facilitating the long-term culture of primitive HSCs.

### 12 **Building a functional bone marrow model**

13 The foundation for the successful culture of HSCs in the bone marrow model is laid by  
14 generating a suitable environment within the 3D hydroxyapatite coated zirconium oxide scaffold  
15 which mimics the situation observed *in vivo* (Fig.1A). MSCs isolated from bone marrow of the  
16 femoral head were cultured on a scaffold engineered with the intention of imitating the porous yet  
17 rigid properties of the human cancellous bone microstructure (Fig. 1B). After one week of culture  
18 the formation of an environment resembling the surroundings observed in the bone marrow *in*  
19 *vivo* was revealed (Sieber et al., 2018). A strong deposition of ECM was visible in the SEM  
20 overview pictures. At a higher magnification, the web-like network of ECM secreted by MSCs  
21 was observable. HSPCs could be seen to reside on the ECM covered surface of the ceramic.  
22 Furthermore, bridge structures that altered the architecture of the scaffold by spanning over

1 cavities could be observed in various places throughout the ceramic. These bridge structures were  
2 also found in human bone marrow samples examined by our group (Fig. 1C and D).  
3 Subsequently, CD34<sup>+</sup> HSPCs isolated from umbilical cord blood were cultured on the prepared  
4 ceramics within the MOC over the course of four weeks. HSPCs were extracted from the ceramic  
5 after 1, 2, 3 and 4 weeks of culture under dynamic conditions and stained for CD34 and CD38.  
6 Although the percentage of CD34<sup>+</sup>CD38<sup>-</sup> HPSCs decreased over the time of culture, a substantial  
7 proportion of the regained cells, on average 32.96%, retained their primitive phenotype after four  
8 weeks of culture (Fig. 1E).

9 To assess the conserved differentiation ability of the long-term cultured HSCs, a CFU-GEMM  
10 assay was conducted. Compared to freshly isolated HSPCs, the colony numbers were comparable  
11 to the freshly isolated HSPCs after four weeks of culture (Fig. 1F).

## 12 **Transcriptome analysis**

13 To assess the impact of 3D cultivation and serum free-medium conditions on MSC transcriptional  
14 changes were determined by next-generation sequencing. Sets of 381 and 554 genes after one and  
15 four weeks respectively were defined to be differentially expressed with significant overlap. (Fig.  
16 2B). Interestingly, clustered heatmap analysis of all expressed genes reveal the transcriptome  
17 properties of individual primary cells with donor intrinsic expression intensities characterized by  
18 donor-specific clustering (Fig. 2A). Comparative cluster analysis of regulated genes  
19 demonstrated a higher similarity of 3D cultivated cells compared to monolayer cells, but the  
20 primary cell character marked by individual transcription intensities was still evident within the  
21 ceramic grown cells (Fig. 2C). To assign affected biological processes and signal transduction  
22 pathways Gene Set Enrichment Analysis was performed. After the pre-cultivation phase to  
23 prepare HSC niche conditions mainly GO-terms connected to proliferative activity, cell cycle

1 regulation and cytoskeleton rearrangement were overrepresented (Fig. 3A). According to the  
2 intensified cell-cell contact in 3D culture genes mediating focal adhesion, gap junction formation,  
3 and ECM-receptor interaction were determined to be overrepresented within the set of  
4 differentially expressed genes (Fig. 3A). To assess the quality of cell division regulation upon  
5 ceramic culture individual cluster analysis for the term GO:0007049 “cell cycle regulation” was  
6 performed. As indicated for the entire set of regulated genes, the majority of the cell cycle genes  
7 were downregulated with a similar pattern of sample clustering (Fig. 3B). Cell cycle progression  
8 is regulated by cyclin-dependent kinases (CDKs) and their activation by members of the cyclin  
9 (CCNs) family or the inhibition by CDK inhibitory molecules (CDKNs). Cluster analysis with  
10 the focus on this three protein families revealed downregulation of supportive molecules and  
11 upregulation of the inhibitors of cell cycle progression within the set of differentially expressed  
12 genes (Fig. 3C).

13 Interestingly, GSEA derived no GO terms related to stem cell maintenance, stem cell niche or  
14 bone marrow microenvironment. To define the functionality of the generated artificial HSC  
15 niche, the expression of molecules known to be essential for HSC maintenance were determined.  
16 The majority of the analyzed molecules are expressed by MSC independent of the cultivation  
17 method with no significant regulation upon 3D culture (Fig. 4 A-C). Only a very few genes like  
18 thrombopoietin CASR or delta-like molecules (DLL) are very little or not expressed at all. In  
19 reference to DESEQ2 analysis, only a small number of genes were differentially expressed.  
20 BMP-2 and Angiopoietin-1 displayed elevated expression whereby molecules like JAG1 and  
21 KITLG showed even decreased RNA levels upon ceramic cultivation Fig. 4 A and B).

## 22 **HSPCs differentiate into various lineages**

1 During the culture of the HSPCs on the MOC, cells that appeared to be HSPCs were observed in  
2 the medium reservoir, i.e., the culture compartment not occupied by the ceramic. To investigate if  
3 the cells had started to differentiate after they had left the environment of the ceramic, the  
4 ceramic and circulating HSPCs were analyzed separately.

5 Native HSCs ( $CD45RA^-CD34^+CD38^-CD90^+$ ) resided more abundantly in the artificial bone  
6 marrow niche in the ceramic compared to the circulation. After 2, 3 and 4 weeks of culture, a  
7 significant difference between the two compartments could be detected (Fig. 5A). The difference  
8 was also apparent when looking at the absolute cell numbers, although only the difference after  
9 three weeks of culture was significant (Fig. 5D). In line with these observations, more cells  
10 expressing the myeloid marker CD45RA were found in the circulation. In percentage as well as  
11 absolute cell numbers, a significant difference could be observed after three weeks of culture  
12 (Fig. 5B and E). Although there was no significant difference in the other weeks, a clear trend  
13 was evident. The same applied for the expression of the erythroid marker CD36.

14 Having established that a significant difference between the cells extracted from the ceramic and  
15 the circulation exists, a more extensive analysis of the subpopulation of differentiated HSPCs was  
16 carried out. Due to a two-week stabilization phase, the cultures lasted for 3, 4 and 5 weeks. The  
17 stabilization phase was introduced to generate a higher starting population. For the  
18 characterization of the cells potentially differentiating in the neutrophil lineage, the occurrence of  
19 GMPs, myeloblasts, myelocytes, and neutrophils was investigated. FACS analysis applying the  
20 individual marker molecules CD34, CD38, CD45RA, CD36, CD15 and CD16 and their  
21 combinations for the distinct differentiation stages were conducted. GMPs and myelocytes were  
22 the cell types essentially found whereas myeloblasts and neutrophils were barely present in both  
23 compartments, the ceramic and the circulation system (Fig. 6).



## 1 **The bone marrow model is robust**

2 The cultivation system is characterized by augmentation of HSC within the first weeks of  
3 culture. Therefore, the option to harvest cells from the system during a running experiment for  
4 multiple applications was assessed. Furthermore, a positive result opens up the possibility to  
5 continually monitor various parameters in bone marrow safety studies without ending the  
6 experiment. After a two-week stabilization phase, all, half or none of the HSPCs extracted from  
7 the circulation during medium exchange were returned to the MOC. After this stabilization  
8 period, the culture ran for an additional 1, 2 or 3 weeks.

9 Regarding the CD34<sup>+</sup>CD38<sup>-</sup> cells, more cells were found in the circulation compared to the  
10 ceramic after three weeks of culture after complete cell reintroduction confirming the  
11 accumulation of HSC in early culture phases. After week five, the percentage of CD34<sup>+</sup>CD38<sup>-</sup>  
12 cells appeared to be evenly distributed except for the 0% reintroduction group where a higher rate  
13 was seen in the circulation. The impact of cell removal was undoubtedly visible but not  
14 significant. Except for the cells extracted from the ceramic after five weeks of culture, a clear  
15 gradation was observable between the three different groups (Fig. 7).

16 Native HSCs (CD45RA<sup>-</sup>CD34<sup>+</sup>CD38<sup>-</sup>CD90<sup>+</sup>) were more abundantly identified in the ceramic as  
17 shown in Figure 5 and 7. An exception was the absolute cell number detected after five weeks of  
18 culture which were evenly distributed. A gradation as seen for the CD34<sup>+</sup>CD38<sup>-</sup> cells was not  
19 observable. Interestingly, the number of native HSCs detected for the 0% reintroduction group  
20 was higher than the 50% reintroduction group and comparable to the 100% reintroduction group  
21 suggesting a renewal of the HSC subpopulation upon cell removal (Fig. 7).

## 22 **Culture of the bone marrow model on the MOC for eight weeks**

1 After successfully culturing the bone marrow model on the MOC for four weeks (Sieber et al.,  
2 2018), the culture time was extended to eight weeks. A longer culture time presents the  
3 possibility to perform long-term repeated drug tests.

4 For the various populations, a variance between the measured percentage and the regarding  
5 absolute cell number was observable. While the percentage of CD34<sup>+</sup>CD38<sup>-</sup> cells decreased, the  
6 absolute cell numbers remained stable between 4 and 8 weeks of culture (Fig. 8 C and H). The  
7 CD45RA<sup>-</sup>CD34<sup>+</sup>CD38<sup>-</sup>CD49f<sup>+</sup> and CD45RA<sup>-</sup>CD34<sup>+</sup>CD38<sup>-</sup>CD90<sup>+</sup> populations nearly vanished  
8 after eight weeks of culture while the CD45RA<sup>-</sup>CD34<sup>+</sup>CD38<sup>-</sup>CD133<sup>+</sup> population only declined  
9 regarding the percentage (Fig. 8F and K).

10 By performing a CFU-GEMM assay, we could test whether the HSCs had kept their ability to  
11 differentiate *in vitro*). No substantial differences could be observed in comparison to the other  
12 culture times. (Fig. 8L)

### 13 **HSCs cultured in the bone marrow model engraft in irradiated immunocompromised mice**

14 Transplantation of cells into irradiated immunocompromised mice is the gold standard assay to  
15 determine the stem cell state of hematopoietic stem cells. It demonstrates that HSCs are still able  
16 to long-term repopulate a vacant bone marrow niche and are therefore native stem cells.

17 The quantification of human CD45 expressing cells in the blood samples taken four, eight and  
18 twelve weeks after the injection of 4 weeks *in vitro* cultured HPSCs into recipient mice revealed  
19 an approximation of the values to the control of freshly isolated cells. No significant difference  
20 was detectable between the two values 12 weeks post-injection (Fig. 9 A-C). The same applied to  
21 the B cell (CD45<sup>+</sup>CD19<sup>+</sup>), monocyte (CD45<sup>+</sup>CD14<sup>+</sup>) and NK cell (CD45<sup>+</sup>CD56<sup>+</sup>CD16<sup>+</sup>)  
22 populations within human CD45<sup>+</sup> cell compartment. The only exception was the occurrence of

1 human T cells (CD45<sup>+</sup>CD3<sup>+</sup>) after 12 weeks which were significantly lower than the control  
2 within the human cell subset (Fig. 9D). All percentages, except for leukocytes, refer to the  
3 CD45<sup>+</sup> gate.

4 After 16 weeks, the number of human leukocytes, T cells, monocytes, and NK cells had increased  
5 further. The B cell population did decrease insignificantly. No control was available for this time  
6 point (Fig 9 E). After 20 weeks the various populations stayed on the same level except for T  
7 cells which had further increased (Fig. 9F).

8  
9 In a second *in vivo* experiment, HSPCs were cultured for eight weeks in the bone marrow model  
10 on the MOC before they were injected into an irradiated immunocompromised mouse. The same  
11 controls used in the experiment above were employed.

12 Compared to the first experiment, the number of human CD45 expressing cells was significantly  
13 lower compared to the controls after 4, 8 and 12 weeks (Fig. 9G - I). Additionally, no T cells  
14 could be observed after 12 weeks, whereas B cells, monocytes, and NK cells were present in a  
15 similar quantity as found in control experiments (Fig. 9J). After 16 and 20 weeks, the number of  
16 human leukocytes in the blood had further increased, which especially applied to the number of T  
17 cells measured (Fig. 9K-L).

## 18 **Discussion**

19 The general aim was the establishment of a model capable of mimicking the human *in vivo* bone  
20 marrow environment. The model should be capable of sustaining native HSCs for at least eight  
21 weeks. The HSC bone marrow niche is a complex environment involving different cell types,

1 their various ways of interaction, and specific physical microenvironments (Crane et al., 2017).  
2 This certain surrounding could only be reconstructed in a three-dimensional platform.

### 3 **Generating a bone marrow model**

4 The foundation for the successful culture of HSPCs in the bone marrow model was laid by  
5 creating a suitable environment which mimics the situation observed *in vivo*. Thus, primary bone  
6 marrow-derived MSCs were employed and cultured on the hydroxyapatite-coated Sponceram 3D  
7 ceramic scaffold. This scaffold was chosen for its human bone marrow mimicking properties.  
8 The pore size and structure of the scaffold is comparable to the human bone marrow of the  
9 femoral head while hydroxyapatite is a close analog of bone apatite, found in hard tissue in all  
10 vertebrates (Junqueira, 2003; Murphy et al., 2010).

11 After four weeks of culture in the serum-free HSPC medium, SEM images demonstrated that the  
12 niche was still densely populated and secretion of ECM could be observed. Interestingly, bridge  
13 structures that altered the architecture of the scaffold by spanning over cavities could be seen in  
14 various places throughout the ceramic. These bridge structures were also observed in human bone  
15 marrow samples examined by our group. Thus, the MSC actively change the environment to their  
16 needs and expand the surface by bridging the cavities. The deposition of ECM molecules may  
17 contribute to the niche biology since essential growth factors and other essential signaling  
18 molecules secreted by the stromal cell compartment can be stored in the rearranged structures.

19 After the addition of the CD34<sup>+</sup> HSPCs isolated from umbilical cord blood, the bone marrow  
20 model was cultured for up to eight weeks. During culture, the HSCs retained their native  
21 phenotype. The reduction of CD34<sup>+</sup>CD38<sup>-</sup> and CD45RA<sup>-</sup>CD34<sup>+</sup>CD38<sup>-</sup>CD90<sup>+</sup> HSPCs over the  
22 course of the culture can very likely be ascribed to part of the population starting to differentiate.  
23 The decline of the latter population indicates the reduced capability to repopulate a vacant bone

1 marrow niche. Nevertheless, the population was still present and approximated the *in vivo*  
2 situation regarding the abundance, where HSC present a very rare population with an estimated  
3 frequency of 0.01% of total nucleated cells (Brendel et al., 2014; Gullo et al., 2015; Notta, F.,  
4 Doulatov, S., Laurenti, E., Poepl, A., Jurisica, I., and Dick, 2011; Rossi et al., 2011). The  
5 assumption of reduction due to cell differentiation is strengthened by the increase of the total cell  
6 number of cells positive for the differentiation markers CD45RA or CD36 as well as the elevated  
7 cell number of the CD34<sup>+</sup>CD38<sup>+</sup> and CD34<sup>-</sup>CD38<sup>+</sup> populations. An explanation might be given  
8 by considering the different environments depicted in the SEM pictures, cells appearing to be  
9 HSPCs were found embedded in ECM or residing directly on the hydroxyapatite-coated surface  
10 of the scaffold. Additionally, direct interactions between HSPCs and MSCs, as well as HSPCs  
11 and other HSPCs, were detected (data not shown). These different culture environments within  
12 the scaffold could explain the diverse HSPC populations identified. A direct interaction either  
13 with nestin-expressing MSCs or the embedding in ECM could be beneficial in preserving the  
14 native HSC phenotype. In contrast, sole HSPCs residing on the hydroxyapatite surface might be  
15 prone to differentiation (Morrison and Scadden, 2014). The CFU-GEMM assay showed that the  
16 cells exhibited a preserved myeloid differentiation capability of the long-term cultured HSPCs.

### 17 **3D cultivation mainly affects proliferate activity**

18 Interestingly, 3D cultivation of MSC rather influenced the proliferative activity of the cells than  
19 the induction of HSC maintaining molecules. Transcriptome analysis demonstrated the down-  
20 regulation of the cell cycle and related cellular processes like DNA replication. Molecules known  
21 to be essential for HSC maintenance in the bone marrow niche are expressed independently from  
22 2D or 3D culture condition (Crane et al., 2017; Pinho et al., 2013). This finding is in accordance  
23 that MSC can be used as a feeder layer to cultivate and to expand CD34<sup>+</sup> HSC in 2D cultivation  
24 systems (Magin et al., 2009; Michalicka et al., 2017). However, in these studies, the cultivation

1 time does not exceed a time frame of 14 days. In our system long-term cultivation of native HSC  
2 at least up to 8 weeks is feasible. The maintenance of native HSC *in vitro* requires serum-free  
3 culture condition. One beneficial effect might be attributed to MSC survival by proliferation  
4 inhibition accompanied by concurrent maintenance of HSC niche factor expression upon ceramic  
5 culture. According to the expression profile, only the administration of two factors (THPO and  
6 FLT3L) yielded in advanced cultivation conditions in the culture system establishment (Sieber et  
7 al., 2018). Furthermore, osteogenic differentiation induction and the generation of a 3D  
8 extracellular matrix network within the ceramic cavities might contribute to bone marrow niche  
9 mimicry. Also, differential expression of particular genes, that cannot be identified by the  
10 employed analysis approaches can be decisive in regulating the HSC pool in described bone  
11 marrow on a chip system. Notable, the transcriptome analysis was characterized by individual  
12 expression levels intrinsic to primary cells. Therefore, it is conceivable to apply the system for  
13 questions of personalized issues regarding HSC maintenance.

#### 14 **Leaving the environment of the ceramic promotes differentiation**

15 The significantly higher occurrence of native HSCs in the artificial *in vitro* bone marrow niche in  
16 the ceramic confirms the beneficial effect of the bone marrow niche on sustaining  
17 undifferentiated HSCs. The process of preserving the native state of the HSCs is a complex  
18 process in which various factors play a role. Besides others, it is an interplay of juxtacrine and  
19 paracrine signaling involving multiple cell types (Morrison and Scadden, 2014). In the  
20 circulation, the juxtacrine signaling between the stromal cells and the HSCs is not existent while  
21 the secreted signals are still present, explaining the reduced but not extinct native HSC population  
22 (Mayani, 2016). Furthermore, it remains unclear how long the native HSCs had resided in the  
23 circulation. It could be possible that the HSCs are continuously flushed out of the ceramic and  
24 subsequently start to differentiate when entering the circulation. This assumption is affirmed by

1 including the data gathered for the expression of the differentiation markers CD36 and CD45RA.  
2 Cells differentiating towards the myeloid or erythroid lineage were found more abundantly in the  
3 circulation. Especially CD45RA expressing cells had a substantially higher occurrence in the  
4 circulation than in the ceramic. The reduction of native HSC during culture could be adjustment  
5 processes within the system. The amount of native HSCs is still too high compared to the *in vivo*  
6 situation where 0.01% are native HSCs (Brendel et al., 2014; Notta, F., Doulatov, S., Laurenti,  
7 E., Poepl, A., Jurisica, I., and Dick, 2011). Additionally, the number of differentiated cells must  
8 increase to build up a functioning hematopoietic system.

### 9 **Rudimental granulopoiesis is observable within the MOC**

10 Rudimental granulopoiesis towards the neutrophil lineage was observable in our model without  
11 the addition of further cytokines. Compared to their occurrence *in vivo* (0.9%) GMPs were more  
12 abundant in our model (~2-4%) while the incidence of myelocytes (~1-3%) was substantially  
13 smaller than *in vivo* (12.7%) (Greer, 1993). A significant number of neutrophils was not  
14 detectable. One reason might be a lack of G-CSF which is critical for neutrophil maturation. The  
15 introduction of endothelial cells, which are known to secrete G-CSF, could solve this problem.  
16 However, it might also lead to the mobilization of the HSCs (Garcia et al., 2015; Zhao et al.,  
17 2012).

### 18 **The model is robust**

19 The removal of cells during medium exchange did not have a significant impact on the bone  
20 marrow niche. It is unknown if the cells, when removed, are flushed out of the ceramic or  
21 actively migrate. The former hypothesis appears more realistic since no vasculature is present  
22 within the model. Compared to the circulation, the ceramic CD34<sup>+</sup>CD38<sup>-</sup> population only  
23 exhibited a small gradation between the 100%, 50%, and 0% values. This finding demonstrates  
24 the robustness of the bone marrow niche. The higher occurrence in the 0% reintroduction group

1 in the circulation could mean that differentiated cells might have a negative influence on the  
2 sustainment of native HSCs.

3 Cell removal and subsequent analysis during a running experiment without destroying the bone  
4 marrow niche are possible. The intrinsic self-stabilization capacity provides the opportunity to  
5 continually monitor lineage changes or genotoxic effects in bone marrow safety studies without  
6 ending the experiment. In a larger scale, it could also be used to expand HSPCs prior  
7 implantation constantly.

8 **HSCs cultured in the bone marrow model on the MOC are capable of engrafting in**  
9 **irradiated immunocompromised mice**

10 Transplantation of cells into irradiated immunocompromised mice remains the gold standard  
11 assay for the assessment of the repopulation capability of hematopoietic stem cells. The  
12 successful repopulation of a vacant bone marrow niche proves that the cells are native HSCs  
13 (Jingjing and ChengCheng, 2015; Nakamura-Ishizu et al., 2014).

14 Even though a significant difference in the T cell population measured after 12 weeks in the  
15 mouse, no other significant differences were observed in comparison to the control. Thus, the  
16 engraftment of the HSCs that were cultured for four weeks in the bone marrow model on the  
17 MOC was successful. Additionally, the sustained hematopoietic activity after 20 weeks proves  
18 that the transplanted cells were native HSCs capable of self-renewal and not MPPs which would  
19 have vanished after this time (Doulatov et al., 2012; Pineault and Abu-khader, 2015).

20 In a second experiment, HSCs were cultured for eight weeks in the bone marrow model on the  
21 MOC. The measured percentages were significantly lower compared to the control. However, all  
22 cell types were present even if monocytes and NK cells nearly vanished after 20 weeks. The low  
23 percentages might be ascribed to the small cell numbers of native HSCs ( $CD45^{RA^-}CD34^+CD38^-$   
24  $CD90^+$ ) which have been depicted in figure 8. Similar results have been described in the literature



1 in cases where only a few native HSCs were used for engraftment experiments (Notta, F.,  
2 Doulatov, S., Laurenti, E., Poepl, A., Jurisica, I., and Dick, 2011).

3 As in the previous experiment, the engraftment was successful. A prolonged experiment time  
4 might have led to an increase in T cells. Nevertheless, all other cell types were present after 20  
5 weeks of culture, again proving the existence of native HSC after an eight-week long culture of  
6 HSPCs in the bone marrow model on the MOC (Doulatov et al., 2012; Pineault and Abu-khader,  
7 2015).

## 8 **Conclusion**

9 The aim of this project was the generation of a model capable of long-term sustainment of  
10 primitive HSCs and its implementation on the MOC. In the first step, a suitable environment for  
11 long-term HSC culture was generated. In the second step, HSPCs isolated from umbilical cord  
12 blood were seeded in this bone marrow mimicking environment. It could be shown that HSCs  
13 remained their native phenotype for at least eight weeks in dynamic culture conditions.  
14 Furthermore, a significant deviation in the differentiation pattern was observed between HSPCs  
15 residing in the circulation and in the ceramic in the MOC. Significantly more native HSCs were  
16 present in the ceramic while significantly more differentiated HSPCs were identified in the  
17 circulation. Also, granulopoiesis could be observed without the addition of further cytokines.

18 In conclusion, the here presented bone marrow model demonstrates for the first time the  
19 successful long-term culture of functional multipotent HSCs in a dynamic environment. The  
20 model surpasses all previously presented 3D bone marrow models in culturing time of HSCs as  
21 well as in mimicking the *in vivo* environment (Kim et al., 2015). Predestining it as a model for  
22 sophisticated *in vitro* drug testing, thus, serving as an alternative to animal testing. It harbors the

1 potential to be developed into a model mimicking the whole human bone marrow and in the  
2 farther future the entire hematopoietic system. The bone marrow model could be interconnected  
3 with other organs on an extended MOC laying the ground stone for the human on a chip.

4  
5

## 6 **Material and Methods**

### 7 **Isolation and expansion of MSCs**

8 Human MSCs were isolated from the bone marrow of femoral heads as described in (Sieber et  
9 al., 2018). In brief, the cells were washed out, separated by density gradient centrifugation, and  
10 the PBMC layer seeded into a T25 culture flask. The cells were cultured in Dulbecco's modified  
11 Eagle's medium (DMEM) (Corning Inc., USA) + 10% Fetal Calf Serum (FCS) (Biochrom,  
12 Germany) + 1% Penicillin-Streptomycin (P/S) (Biowest, France) and used until passage 7.

### 13 **Isolation of HSPCs**

14 Human HSPCs were isolated from umbilical cord blood as described in (Sieber et al., 2018) In  
15 brief, the blood was separated by density gradient centrifugation and HSPCs were segregated  
16 from the other cells using the Miltenyi MACS CD34<sup>+</sup> isolation kit (Miltenyi Biotec, Germany).  
17 Cell number, phenotype, and purity were evaluated by flow cytometry according to CD34, CD38,  
18 CD45RA, CD49f, CD90, and CD133 (all Miltenyi Biotec, Germany) expression. The cells were  
19 resuspended in StemSpan ACF (Stemcell Technologies, USA) + 25 ng/ml FLT3-L + 10 ng/ml  
20 TPO (both PeproTech, USA) + 1% P/S.

### 21 **3D cell culture**

22 Hydroxyapatite-coated zirconium oxide based Sponceram 3D ceramic scaffolds (Zellwerk  
23 GmbH, Germany) were used as a scaffold for the 3D culture. The cylindrically shaped ceramics

1 are 5.8 mm in height and diameter. The pore size in the ceramic is the same as observed for the  
2 human bone marrow. MSCs were seeded onto the scaffold in DMEM + 10% FCS + 1% P/S and  
3 cultured for seven days. Subsequently, medium was changed to Stemspan-ACF + 25 ng/ml  
4 FLT3-L + 10 ng/ml TPO + 1% P/S and 5,000 CD34<sup>+</sup>CD38<sup>-</sup> HSPCs were added and allowed to  
5 adhere overnight in the incubator. The next morning, the ceramics were transferred to the MOC  
6 for dynamic culture. For medium exchange, the medium was collected and centrifuged at 300 g  
7 for 5 min. The supernatant was discarded, and the pellet resuspended in fresh medium and  
8 transferred back onto the ceramic. The medium was exchanged every 2 to 3 days.

9 In one experiment, ceramic and circulating HSPCs were analyzed separately, the ceramic was  
10 transferred from the culture compartment to a 24-well plate well for extraction of HSPCs. The  
11 remaining HSPCs in the MOC were defined as circulating cells.

12 In another experiment, after a two-week stabilization period, all, 50% or 0% of the HSPCs  
13 extracted during medium exchange were returned to the MOC. For the 50% return, half the  
14 medium was discarded before centrifugation. After centrifugation, the pellets were each  
15 resuspended in fresh medium and pipetted back into the medium or ceramic reservoir,  
16 respectively. For the 0% return, the whole medium cell suspension was discarded. The medium  
17 was exchanged for the last time as described above two days prior cells were being analyzed.

## 18 **Microfluidic system**

19 The multi-organ-chip is a microfluidic platform which was developed in our institute. It consists  
20 of two separate independent circular channel systems. Each circuit is hosting two culture  
21 compartments interconnected by a channel system. The flow rate of the medium is controlled by  
22 a peristaltic on-chip micropump which is integrated into each circuit. One pump consists of two  
23 valves which surround one pumping membrane. All of them are operated by air pressure. The air

1 pressure is generated by a control unit to which the MOC is connected via tubes. The control unit  
2 controls the flow rate and volume of the medium in the chip. The pump provides a pulsatile  
3 medium flow through 100  $\mu\text{m}$  high and 500  $\mu\text{m}$  wide channels. The pumping volume ranges 5-70  
4  $\mu\text{l min}^{-1}$  and the frequency 0.2-2.5 Hz. (Ataç et al., 2013; Marx et al., 2012; Maschmeyer et al.,  
5 2015; Sonntag et al., 2010). A pump frequency of 2 Hz for the continuous dynamic operation at a  
6 flow rate of 5  $\mu\text{l min}^{-1}$  was used. The MOC was manufactured as described by Wagner et al.  
7 (Wagner et al., 2013). In brief, Wacker primer (Wacker Chemie, Germany) was applied to the  
8 adapter plate and incubated for 20 min at 80°C. Next, a casting chamber was prepared to consist  
9 of the prepared adapter plate, a master mold, and a casting frame. PDMS was injected into this  
10 casting station, and the whole setup was incubated for 60 min at 80°C. The resulting 2 mm thick  
11 PDMS layer containing the imprint of the pumps and channels was permanently bonded by low-  
12 pressure plasma oxidation to a glass slide with a footprint of 75 x 25 mm (Menzel, Germany),  
13 thereby forming the enclosed microfluidic channel system (Wagner et al., 2013).

14 The seeded ceramic was placed in one of the two culture compartments of each circuit. Only the  
15 outer compartments of the system were used for the ceramic while the inner served as medium  
16 reservoirs.

### 17 **Scanning electron microscopy (SEM)**

18 Electron microscopy was performed in the department for electron microscopy (ZELMI) of the  
19 TU Berlin employing a Hitachi S-4000 (Hitachi, Japan). The bone marrow model was cultured  
20 for four weeks on the MOC. The medium was removed, the ceramics were carefully washed with  
21 PBS and afterward fixed in 4% PFA for three hours. The day before microscopy, samples were  
22 dried using an ascending sequence. The samples were mounted on a support using silver before  
23 being transferred to a vacuum chamber and sputter-coated with gold.

## 1 **Flow cytometry**

2 Cells were stained with anti-human antibody for CD34-PE, CD38-APC, CD45RA-VioBlue,  
3 CD49f-FITC, CD90-FITC, CD133-FITC, CD36-FITC, CD15-PE-Vio770 and CD16-PerCP-  
4 Vio700 (all Miltenyi Biotec, Germany) in the dark for 10 min on ice. The analysis was carried  
5 out using a Miltenyi MACSQuant Analyzer flow cytometer (Miltenyi Biotec, Germany). Data  
6 were processed using FlowJo 10 (FlowJo LLC, USA).

## 7 **CFU-GEMM assay**

8 The myeloid differentiation potential of the HSPCs extracted from the ceramic was assessed by  
9 colony forming unit - granulocyte, erythrocyte, macrophage, megakaryocyte (CFU-GEMM)  
10 assay using Miltenyi's StemMACS HSC-CFU media (Miltenyi Biotec, Germany). The assay was  
11 performed following the instructions provided by the manufacturer.

## 12 **Transcriptome analysis via next-generation sequencing**

13 Transcriptome analysis was performed by using next-generation sequencing (NGS) from  
14 Illumina. First, a cDNA library was generated employing the TruSeq® Stranded mRNA LT  
15 Sample Prep Kit (Illumina), according to the TruSeq® Stranded mRNA Sample Preparation  
16 Protocol LS (Illumina). The initial quantity of total RNA was 800 ng for BMSCs and 50-110 ng  
17 for HSPCs. The cDNA was enriched via PCR. Diverse purification steps to separate the nucleic  
18 acid from reaction mix between the steps were performed with Mag-Bind® RXNPure Plus  
19 magnetic beads (Omega Bio-Tec Inc.). As a quality control and to determine the concentration  
20 and size of the fragments, the cDNA was analyzed with a UV-Vis spectrophotometer  
21 (NanoDrop2000, Thermo Scientific) and gel electrophoresis (2% agarose).

22 The sequencing was carried out by the Illumina MiSeq® System. Raw data, generated by the  
23 Illumina MiSeq® platform, were processed on the Galaxy Project Platform (Afgan et al., 2018),  
24 using the tools FASTQ Groomer, to convert the output data into Sanger sequencing data.

1 Fragments were then mapped against the human genome (hg38) to detect splice junctions  
2 between exons by HISAT2. Mapped reads were processed to the FeatureCount tool on the  
3 Galaxy Project Platform. Differential expression analysis was performed by the DESEQ2  
4 algorithm (nominal p-value < 0,05; FD>2) provided by DE analysis  
5 (<https://yanli.shinyapps.io/DEApp/> - App bioinformatics core, Center for Research Informatics  
6 (CRI), Biological Science Division (BSD), University of Chicago). Differentially regulated genes  
7 were analyzed for overrepresented gene sets by GSEA (Gene Set Enrichment Analysis –  
8 <http://software.broadinstitute.org/gsea/index.jsp>; broad institute, Cambridge; ) (Subramanian,  
9 Tamayo, et al. (Subramanian et al., 2014). Heatmap generation was conducted by ClustVis  
10 analysis platform (Metsalu and Vilo, 2015) and the Morpheus tool from broad institute  
11 Cambridge (<https://software.broadinstitute.org/morpheus>).

## 12 **In vivo application of HSC into immunodeficient mice**

13 For in vivo application of HSC NOD.cg-Prkdc scid Il2rg tm1 Saug (NOG) mouse strain from  
14 Taconic was used. Three-week-old NOG mice were irradiated with 1.5Gy at least 4h before HSC  
15 application.

16 HSC samples for direct application without in vitro culture were thawed in high percentage  
17 serum solution (50% FBS, 50%PBS). Cell number was determined, and  $5 \times 10^4$  HSC were  
18 resuspended in 200 $\mu$ l per mice for intravenous application. HSC samples from in vitro expansion  
19 were also counted, and the same cell number was adjusted. The whole 200  $\mu$ l cell suspension was  
20 subsequently injected into the tail vein of the mice.

21 Blood samples were taken after 4, 8, 12, 16, 20 and 24 weeks. Blood cells were analyzed using  
22 flow cytometry. After four and eight weeks, the cells were stained for CD45 and HLA (Miltenyi).

23 At all other points in time, the cells were stained with the 7-Color-Immunophenotyping Kit from  
24 Miltenyi. Samples were blocked with human and murine FcR blocking reagent and antibodies

1 were used concerning manufactures instructions. Blood lysis was employed at the end of the  
2 staining protocol to eliminate erythrocytes from samples.

3

#### 4 **Statistical analysis**

5 Unpaired t-test was applied to the data sets, using GraphPad Prism software version 6.04  
6 (GraphPad Software Inc., USA). P values smaller than or equal to 0.05 were considered  
7 significant.

#### 8 **References**

- 9 Afgan E, Baker D, Batut B, Van Den Beek M, Bouvier D, Ech M, Chilton J, Clements D, Coraor  
10 N, Grüning BA, Guerler A, Hillman-Jackson J, Hiltemann S, Jalili V, Rasche H, Soranzo N,  
11 Goecks J, Taylor J, Nekrutenko A, Blankenberg D. 2018. The Galaxy platform for  
12 accessible, reproducible and collaborative biomedical analyses: 2018 update. *Nucleic Acids*  
13 *Res.* doi:10.1093/nar/gky379
- 14 Arai F, Suda T. 2007. Maintenance of quiescent hematopoietic stem cells in the osteoblastic  
15 niche. *Ann N Y Acad Sci* **1106**:41–53. doi:10.1196/annals.1392.005
- 16 Ataç B, Wagner I, Horland R, Lauster R, Marx U, Tonevitsky AG, Azar RP, Lindner G. 2013.  
17 Skin and hair on-a-chip: in vitro skin models versus ex vivo tissue maintenance with  
18 dynamic perfusion. *Lab Chip* **13**:3555–61. doi:10.1039/c3lc50227a
- 19 Attar A. 2014. Changes in the Cell Surface Markers During Normal Hematopoiesis: A Guide to  
20 Cell Isolation. *Glob J Hematol Blood Transfus.* doi:10.15379/2408-9877.2014.01.01.4
- 21 Brendel C, Goebel B, Daniela A, Brugman M, Kneissl S, Schwäble J, Kaufmann KB, Müller-  
22 Kuller U, Kunkel H, Chen-Wichmann L, Abel T, Serve H, Bystrykh L, Buchholz CJ, Grez

- 1 M. 2014. CD133-targeted Gene Transfer Into Long-term Repopulating Hematopoietic Stem  
2 Cells. *Mol Ther* **23**:63–70. doi:10.1038/mt.2014.173
- 3 Crane GM, Jeffery E, Morrison SJ. 2017. Adult haematopoietic stem cell niches. *Nat Rev*  
4 *Immunol*. doi:10.1038/nri.2017.53
- 5 Di Maggio N, Piccinini E, Jaworski M, Trumpp A, Wendt DJ, Martin I. 2011. Toward modeling  
6 the bone marrow niche using scaffold-based 3D culture systems. *Biomaterials* **32**:321–9.  
7 doi:10.1016/j.biomaterials.2010.09.041
- 8 Doulatov S, Notta F, Laurenti E, Dick JE. 2012. Hematopoiesis: A human perspective. *Cell Stem*  
9 *Cell* **10**:120–136. doi:10.1016/j.stem.2012.01.006
- 10 Garcia NP, de Leon EB, da Costa AG, Tarragô AM, Pimentel JP, Fraporti L, de Araujo FF,  
11 Campos FMF, Teixeira-Carvalho A, Martins-Filho OA, Malheiro A. 2015. Kinetics of  
12 mesenchymal and hematopoietic stem cells mobilization by G-CSF and its impact on the  
13 cytokine microenvironment in primary cultures. *Cell Immunol* **293**:1–9.  
14 doi:10.1016/j.cellimm.2014.09.006
- 15 Greer JP. 1993. Wintrobe's Clinical Hematology, 9th ed, Journal of clinical pathology.  
16 Philadelphia: Lea & Febiger. doi:10.1136/jcp.46.12.1142-c
- 17 Gullo F, van der Garde M, Russo G, Pennisi M, Motta S, Pappalardo F, Watt S. 2015.  
18 Computational modeling of the expansion of human cord blood CD133+ hematopoietic  
19 stem/progenitor cells with different cytokine combinations. *Bioinformatics* **31**:2514–22.  
20 doi:10.1093/bioinformatics/btv172
- 21 Hackam, D.G., and Redelmeier D. 2006. Translation of research evidence from animals to  
22 humans. *Jama* **296**:1731–1732. doi:10.1001/jama.296.14.1731



- 1 Jingjing X, ChengCheng Z. 2015. Ex vivo expansion of hematopoietic stem cells. *Sci China Life*  
2 *Sci* **58**:839–853. doi:10.1007/s11427-015-4895-3
- 3 Junqueira LCJC. 2003. Basic Histology, 10th ed. McGraw-Hill Companies.
- 4 Kim J, Lee H, Selimović Š, Gauvin R, Bae H. 2015. Organ-on-a-chip: development and clinical  
5 prospects toward toxicity assessment with an emphasis on bone marrow. *Drug Saf* **38**:409–  
6 18. doi:10.1007/s40264-015-0284-x
- 7 Lilly AJ, Johnson WE, Bunce CM. 2011. The haematopoietic stem cell niche: new insights into  
8 the mechanisms regulating haematopoietic stem cell behaviour. *Stem Cells Int* **2011**:274564.  
9 doi:10.4061/2011/274564
- 10 Magin AS, Körfer NR, Partenheimer H, Lange C, Zander A, Noll T. 2009. Primary Cells as  
11 Feeder Cells for Coculture Expansion of Human Hematopoietic Stem Cells from Umbilical  
12 Cord Blood—A Comparative Study. *Stem Cells Dev*. doi:10.1089/scd.2007.0273
- 13 Marx U, Walles H, Hoffmann S, Lindner G, Horland R, Sonntag F, Klotzbach U, Sakharov D,  
14 Tonevitsky A, Lauster R. 2012. “Human-on-a-chip” developments: a translational cutting-  
15 edge alternative to systemic safety assessment and efficiency evaluation of substances in  
16 laboratory animals and man? *Altern Lab Anim* **40**:235–57.
- 17 Maschmeyer I, Hasenberg T, Jaenicke A, Lindner M, Lorenz AK, Zech J, Garbe L-A, Sonntag F,  
18 Hayden P, Ayehunie S, Lauster R, Marx U, Materne E-M. 2015. Chip-based human liver–  
19 intestine and liver–skin co-cultures – A first step toward systemic repeated dose substance  
20 testing in vitro. *Eur J Pharm Biopharm*. doi:10.1016/j.ejpb.2015.03.002
- 21 Mayani H. 2016. The regulation of hematopoietic stem cell populations. *F1000Research* **5**:1524.  
22 doi:10.12688/f1000research.8532.1

- 1 Metsalu T, Vilo J. 2015. ClustVis: A web tool for visualizing clustering of multivariate data  
2 using Principal Component Analysis and heatmap. *Nucleic Acids Res.*  
3 doi:10.1093/nar/gkv468
- 4 Michalicka M, Boisjoli G, Jahan S, Hovey O, Doxtator E, Abu-Khader A, Pasha R, Pineault N.  
5 2017. Human Bone Marrow Mesenchymal Stromal Cell-Derived Osteoblasts Promote the  
6 Expansion of Hematopoietic Progenitors Through Beta-Catenin and Notch Signaling  
7 Pathways. *Stem Cells Dev.* doi:10.1089/scd.2017.0133
- 8 Morrison SJ, Scadden DT. 2014. The bone marrow niche for haematopoietic stem cells. *Nature*  
9 **505**:327–34. doi:10.1038/nature12984
- 10 Murphy CM, Haugh MG, O’Brien FJ. 2010. The effect of mean pore size on cell attachment,  
11 proliferation and migration in collagen-glycosaminoglycan scaffolds for bone tissue  
12 engineering. *Biomaterials* **31**:461–466. doi:10.1016/j.biomaterials.2009.09.063
- 13 Nakamura-Ishizu A, Takizawa H, Suda T. 2014. The analysis, roles and regulation of quiescence  
14 in hematopoietic stem cells. *Development* **141**:4656–66. doi:10.1242/dev.106575
- 15 Notta, F., Doulatov, S., Laurenti, E., Poeppl, A., Jurisica, I., and Dick JE. 2011. Isolation of  
16 Single Human Hematopoietic Stem Cells Capable of Long-Term Multilineage Engraftment.  
17 *Science (80- )* **333**:218–221.
- 18 Perel P, Roberts I, Sena E, Wheble P, Briscoe C, Sandercock P, Macleod M, Mignini LE,  
19 Jayaram P, Khan KS. 2007. Comparison of treatment effects between animal experiments  
20 and clinical trials: systematic review. *Bmj* **334**:197-. doi:10.1136/bmj.39048.407928.BE
- 21 Pineault N, Abu-khader A. 2015. Advances in umbilical cord blood stem cell expansion and  
22 clinical translation. *Exp Hematol* **43**:498–513. doi:10.1016/j.exphem.2015.04.011

- 1 Pinho S, Lacombe J, Hanoun M, Mizoguchi T, Bruns I, Kunisaki Y, Frenette PS. 2013. PDGFR $\alpha$   
2 and CD51 mark human Nestin + sphere-forming mesenchymal stem cells capable of  
3 hematopoietic progenitor cell expansion. *J Exp Med* **210**:1351–1367.  
4 doi:10.1084/jem.20122252
- 5 Rossi L, Challen GA, Sirin O, Lin KKY, Goodell MA. 2011. Hematopoietic stem cell  
6 characterization and isolation. *Methods Mol Biol*. doi:10.1007/978-1-61779-145-1\_3
- 7 Schofield R. 1978. The relationship between the spleen colony-forming cell and the haemopoietic  
8 stem cell. *Blood Cells* **4**:7–25.
- 9 Sharma MB, Limaye LS, Kale VP. 2012. Mimicking the functional hematopoietic stem cell niche  
10 in vitro: recapitulation of marrow physiology by hydrogel-based three-dimensional cultures  
11 of mesenchymal stromal cells. *Haematologica* **97**:651–60.  
12 doi:10.3324/haematol.2011.050500
- 13 Sieber S, Wirth L, Cavak N, Koenigsmark M, Marx U, Lauster R, Rosowski M. 2018. Bone  
14 marrow-on-a-chip: Long-term culture of human haematopoietic stem cells in a three-  
15 dimensional microfluidic environment. *J Tissue Eng Regen Med* **12**:479–489.  
16 doi:10.1002/term.2507
- 17 Sonntag F, Schilling N, Mader K, Gruchow M, Klotzbach U, Lindner G, Horland R, Wagner I,  
18 Lauster R, Howitz S, Hoffmann S, Marx U. 2010. Design and prototyping of a chip-based  
19 multi-micro-organoid culture system for substance testing, predictive to human (substance)  
20 exposure. *J Biotechnol* **148**:70–5. doi:10.1016/j.jbiotec.2010.02.001
- 21 Subramanian A, Tamayo P, Mootha V. 2014. GSEA $\square$ : Gene set enrichment analysis Gene set  
22 enrichment analysis $\square$ : A knowledge-based approach for interpreting genome-wide

- 1 expression profiles. *Proc Natl Acad Sci U S A*. doi:10.1073/pnas.0506580102
- 2 Torisawa Y, Spina CS, Mammoto T, Mammoto A, Weaver JC, Tat T, Collins JJ, Ingber DE.  
3 2014. Bone marrow-on-a-chip replicates hematopoietic niche physiology in vitro. *Nat*  
4 *Methods* **11**:663–9. doi:10.1038/nmeth.2938
- 5 Wagner I, Materne E-M, Brincker S, Süßbier U, Frädrich C, Busek M, Sonntag F, Sakharov D a,  
6 Trushkin E V, Tonevitsky AG, Lauster R, Marx U. 2013. A dynamic multi-organ-chip for  
7 long-term cultivation and substance testing proven by 3D human liver and skin tissue co-  
8 culture. *Lab Chip* **13**:3538–47. doi:10.1039/c3lc50234a
- 9 Walasek MA, Os R Van, Haan G De. 2012. Hematopoietic stem cell expansion □: challenges and  
10 opportunities **1266**:138–150. doi:10.1111/j.1749-6632.2012.06549.x
- 11 Yu VWC, Scadden DT. 2016. Hematopoietic Stem Cell and Its Bone Marrow Niche. *Curr Top*  
12 *Dev Biol* **118**:21–44. doi:10.1016/bs.ctdb.2016.01.009
- 13 Zhao E, Xu H, Wang L, Kryczek I, Wu K, Hu Y, Wang G, Zou W. 2012. Bone marrow and the  
14 control of immunity. *Cell Mol Immunol* **9**:11–19. doi:10.1038/cmi.2011.47

15

16

17

18

1 **Fig. 1:** Hematopoietic stem cells are maintained for at least four weeks in the bone marrow  
2 model. **(A)** Bone marrow-derived MSC and umbilical cord blood-derived HSC were successively  
3 cultivated on the ceramic scaffold and subsequently integrated into the microfluidic organ on a  
4 chip platform. **(B)** The ceramic surrogate possesses high resemblance in structure and porosity to  
5 the in vivo counterpart **(C-D)** SEM analysis after one week of ceramic cultivation displayed the  
6 preparation of the HSC niche conditions. The MSC densely settled the ceramic, secreted  
7 extracellular matrix molecules and actively rearranged the ceramic cavities by bridge formation  
8 to provide a suitable niche microenvironment. **(E)** Representative FACS plot of HSPC extracted  
9 from the bone marrow model after 47 weeks of culture. Significant amounts of CD34<sup>+</sup> single  
10 positive HSPC prove the capacity for long-term cultivation of hematopoietic stem cells (left) with  
11 even increase of the stem cells within the first three weeks of culture (right) (n=8). The elicited  
12 proliferative activity renders the system eligible for in vitro multiplication of the rare HSPC  
13 population. **(F)** The in vitro cultivated HSPC maintain their characteristic differentiation capacity  
14 in vitro with comparable efficacy to freshly isolated cells. The Table is showing the mean number  
15 of counted colonies of the CFU-GEMM assay performed with cells extracted after four weeks of  
16 culture (n = 7) or with freshly isolated HSPCs from umbilical cord blood.

17

1 **Fig. 2:** Fig. 2: Comprehensive transcriptome analysis by next-generation sequencing **(A)** After  
2 one and four weeks of scaffold cultivation of MSCs RNA was isolated and differentially  
3 expressed genes were determined by sequencing technology. Cluster analysis of all expressed  
4 genes revealed a higher resemblance of 3D cultivated cells compared to monolayer MSCs.  
5 However, the expression pattern and the cluster formation is dominated by the primary cell  
6 character marked by individual intrinsic expression strengths (n=2). **(B)** An increasing set of 381  
7 and 554 differentially expressed genes with significant overlap after one and four weeks  
8 respectively account for a progressive process of MSC alteration upon ceramic cultivation [the  
9 DESEQ2 algorithm; nominal p-value < 0,05; FD>2) provided by DE analysis  
10 (<https://yanli.shinyapps.io/DEApp/>). **(C)** Clustered heat map analysis with a focus on  
11 differentially expressed genes substantiates the resemblance of 3D cultivated cells, however,  
12 within the clustered group of MSCs on ceramic the primary cell character of individual donors  
13 marked by respective transcription intensities remains evident.

14

1 **Fig. 3** Gene set enrichment analysis of differentially expressed genes designated the cell cycle  
2 and related pathways to be the most prominent affected biological function  
3 [<http://software.broadinstitute.org/gsea/index.jsp>; broad institute, Cambridge] **(A)** Differentially  
4 expressed genes were analysed for overrepresented GO-terms regarding molecular function,  
5 biological process, cellular component, and KEGG pathways. Cell cycle regulation and related  
6 terms, cytoskeleton organization and cell to cell or cell to matrix interaction are highlighted to be  
7 the most influenced functions [bars - the number of differentially expressed genes in the  
8 corresponding GO\_term; red dot percentage overlap of differentially expressed genes within the  
9 group; p-values for each GO-term are given in numbers]. **(B)** Heatmap cluster analysis of  
10 differentially expressed gene of GO-0007049 (#cell cycle regulation) displayed downmodulation  
11 of the majority of genes with similar cluster properties observed for the entire set of regulated  
12 genes. **(C)** Focused cluster analysis of the central regulators of the cell cycle progression revealed  
13 upregulation of cyclin-dependent kinase inhibitors (CDKN) and downregulation of CDKs and the  
14 activating cyclin molecules. 3D cultivation of MSC downregulates the cell cycle and cell  
15 proliferation.

16

17

1 **Fig 4.** The majority of genes known to affect the HSC niche biology are expressed independently  
2 from the cultivation condition. (A) RPM gene expression values from next-generation sequencing  
3 for genes involved in HSC maintenance in the bone marrow and with focus on BMPs (B) and the  
4 WNT family (C) are shown. The genes are not differentially expressed but present in significant  
5 strength to fulfill their functions in the in vitro cultivation system independent of induction upon  
6 the ceramic cultivation.



1 **Fig. 5:** Cells extracted from the ceramic and the circulation display different surface marker  
2 expression patterns. **(A-C)** Percentage and **(D-F)** absolute cell numbers of CD45RA-  
3 CD34<sup>+</sup>CD38<sup>-</sup>CD90<sup>+</sup>, CD45RA<sup>+</sup> or CD36<sup>+</sup> cells cultured on the MOC for 1, 2, 3 and 4 weeks.  
4 Cells extracted from the ceramic and the circulation were stained and analyzed separately by flow  
5 cytometry. **(A and D)** HSCs with the phenotype CD45RA<sup>-</sup>CD34<sup>+</sup>CD38<sup>-</sup>CD90<sup>+</sup> are  
6 predominantly located in the ceramic scaffold with a significant difference after three weeks,  
7 while the more differentiated progeny cells expressing the surface markers **(B and E)** CD45 and  
8 **(C and F)** CD36 appear enriched in the circulating system. Asterisks indicate a significant  
9 difference between the two values. Error bars represent the standard deviation (n=5).  
10

1 **Fig. 6** Differentiation of HSPCs towards the neutrophil lineage is observable. **(A)** Scheme of  
2 Neutrophil differentiation stages of HSPCs. Cells were extracted to the designated time points  
3 from the ceramic compartment or the circulating periphery. For the characterization of the cells  
4 potentially differentiating in the neutrophil lineage, the occurrence of GMPs ( $CD36^-CD45RA^+CD34^+CD38^+CD15^-CD16^-$ ),  
5 myeloblasts ( $CD36^-CD45RA^+CD34^+CD38^+CD15^+CD16^-$ ),  
6 myelocytes ( $CD36^-CD45RA^-CD34^-CD38^+CD15^+CD16^-$ ) and neutrophils ( $CD36^-CD45RA^-CD34^-$   
7  $CD38^+CD15^+CD16^+$ ) were investigated (Attar, 2014). The cell types investigated in the  
8 experiment are written in bold. **(B-E)**. Percentage and absolute cell number of GMPs,  
9 myeloblasts, myelocytes, and neutrophils extracted from the ceramic or the circulation after 3, 4  
10 and 5 weeks of culture, respectively. Error bars represent the standard deviation (n=3). The  
11 differentiation pattern depicted in (A) was modeled after Stiene-Martin et al. Stiene-Martin, A.  
12 Leukocyte Development, Kinetics, and Functions. *clinicalgate* (2015).

13

14

1 **Fig 7:** Impact on the hematopoietic population by reintroducing 100%, 50% or 0% of cells during  
2 medium exchange demonstrates the robustness of the system.

3 **(A-B)** Percentage and absolute cell numbers of CD34+CD38- cells and **(C-D)** of CD45RA-CD34+CD38-  
4 CD90+ cells collected from the ceramic or the circulation after 3, 4 or 5 weeks of culture. During the  
5 medium exchange, 100%, 50% or 0% of the cells were reintroduced into the MOC. The removal of the  
6 cells showed only small effects suggesting an intrinsic self-stabilization capacity of the cultivation system.  
7 A two-week long stabilization phase with 100% reintroduction of cells preceded the experiment. Error  
8 bars represent the standard deviation.

9

10

11

1 **Fig. 8** HSCs maintain their primitive phenotype in dynamic conditions over the course of eight  
2 weeks  
3 **(A)** Representative FACS plots of HSPCs extracted from the ceramic after eight weeks of culture  
4 on the MOC. Cells were stained for CD34 and CD38. **(B)** Representative FACS plots of  
5 CD45RA-CD34+CD38-CD49f+, CD45RA-CD34+CD38-CD90+ and CD45RA-CD34+CD38-  
6 CD133+ cells. The black numbers refer to the percentage of positive cells gated in the FSC/SSC,  
7 whereas the smaller, red numbers refer to the percentage of positive cells of the parent gate. **(C-**  
8 **E)** Percentage of CD34+CD38-, CD34+CD38+ and CD34-CD38+ cells over the course of eight  
9 weeks of culture in comparison to freshly isolated HSPCs. **(F)** Percentage of CD45RA-  
10 CD34+CD38-CD49f+, CD45RA-CD34+CD38-CD90+ and CD45RA-CD34+CD38-CD133+  
11 cells directly after isolation, four weeks or eight weeks of culture. **(H-K)** The corresponding  
12 absolute cell numbers to **C-F**. The bridge connecting two values with the asterisk represents a  
13 significant difference. The error bars represent the standard deviation (n=3)  
14 **(L)** HSPCs are still able to differentiate after eight weeks of culture. Representative pictures of  
15 burst-forming-unit erythrocyte (BFU-E), colony-forming-unit erythrocyte (CFU-E), granulocyte  
16 (CFU-G), macrophage (CFU-M), granulocyte, macrophage (CFU-GM) and granulocyte,  
17 erythrocyte, macrophage, megakaryocyte (CFU-GEMM) colonies. The colonies originated from  
18 cells that were cultured under dynamic conditions for eight weeks (n=3). Table shows mean  
19 values and standard deviation of counted colonies of the CFU-GEMM assay performed with cells  
20 extracted after 4 and 8 weeks of culture in dynamic conditions or with freshly isolated HSPCs  
21 from umbilical cord blood.

1 **Fig. 9** HSCs cultured for four weeks and eight weeks on the MOC can engraft in irradiated  
2 immunocompromised mice after transplantation. HSPCs freshly isolated from umbilical cord  
3 blood or cultured for four or eight weeks on the MOC were injected into irradiated  
4 immunocompromised mice. Blood samples were taken to the indicated time points. **(A-C)**  
5 Percentage of human CD45<sup>+</sup> cells detected in the blood samples taken 4, 8 and 12 weeks after the  
6 injection of the HSPCs. **(D-F)** Analysis of particular immune cell populations (T cells, B cells,  
7 Monocytes, and NK) of human origin after 12 weeks **(D)**, 16 weeks **(E)** and 20 weeks **(F)** of  
8 culture. The percentages of CD4<sup>+</sup> and CD8<sup>+</sup> T cells refer to the T cell gate as indicated by the  
9 dotted rectangle. **(G-L)** Transplantation experiments were repeated with eight weeks in vitro  
10 cultivated HSPCs with the equivalent evaluation approach. **(G-I)** Percentage of human CD45<sup>+</sup>  
11 cells detected in blood samples taken 4, 8 and 12 weeks after the transplantation. **(J-L)**  
12 Evaluation of individual human immune cell populations **(J)** 12 weeks, **(K)** 16 weeks and **(L)** 20  
13 weeks after cell administration. As in figure **E and F**, the percentages of CD4<sup>+</sup> and CD8<sup>+</sup> T cells  
14 refer to the T cell gate as indicated by the dotted rectangle. The error bars represent the standard  
15 deviation.

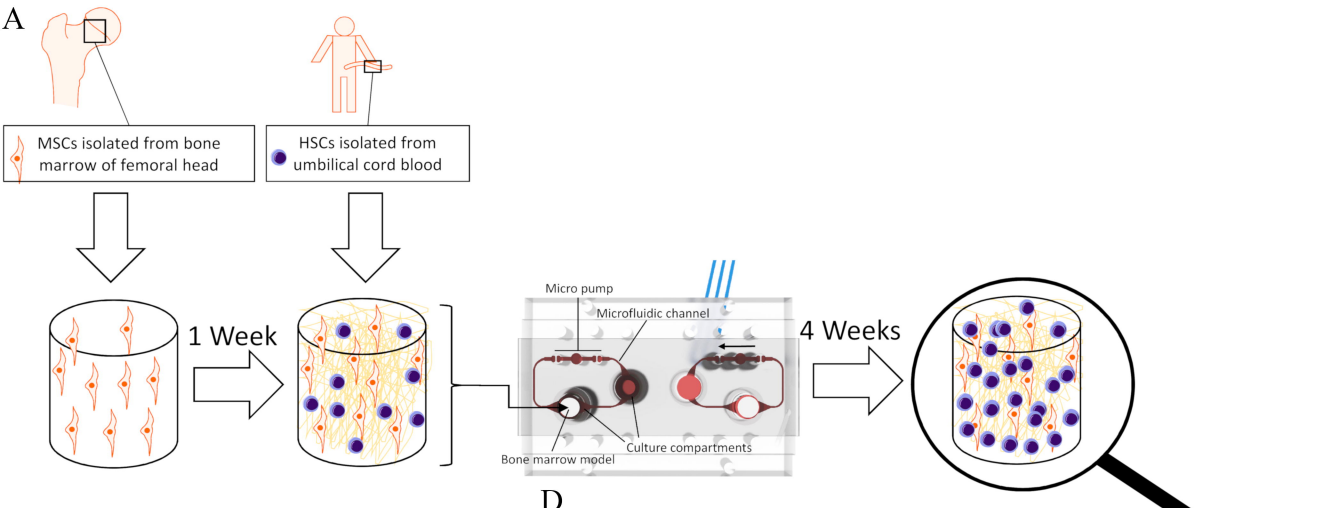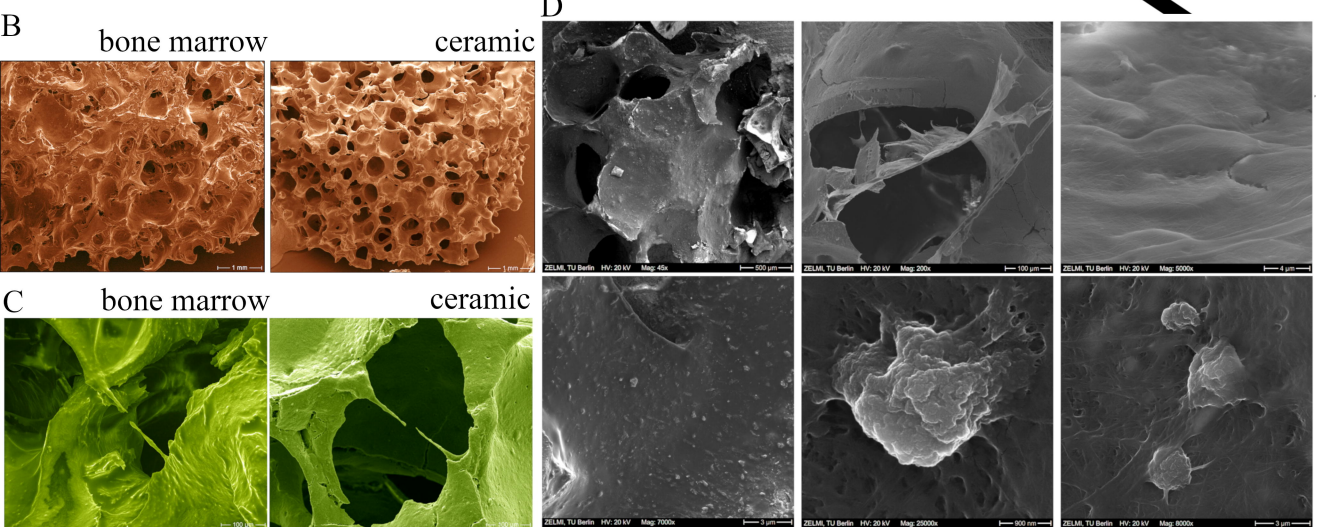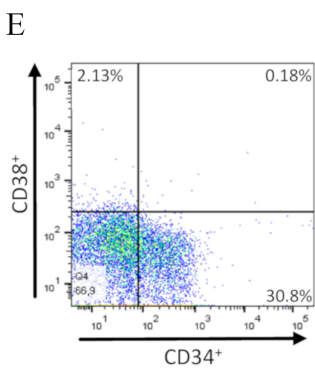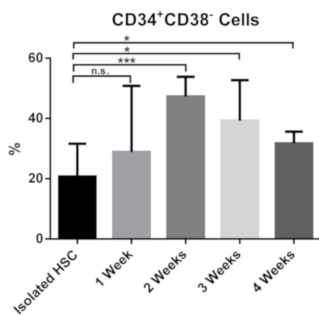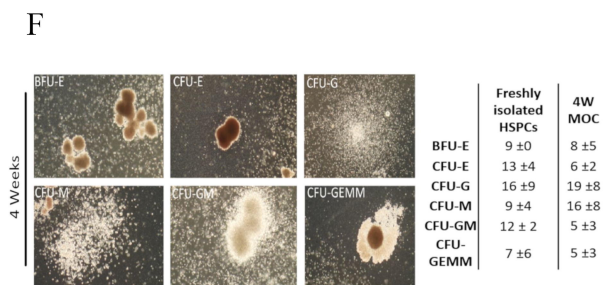

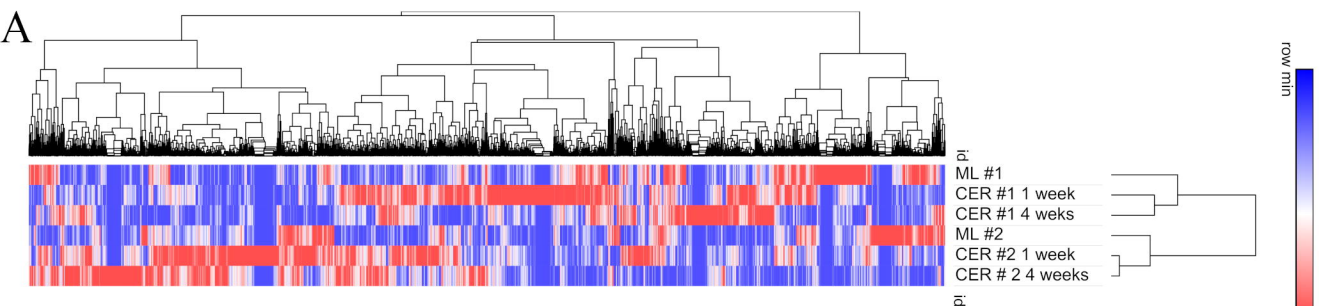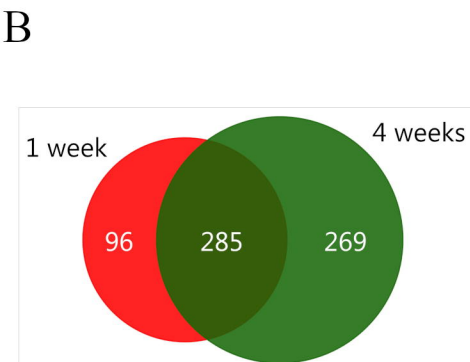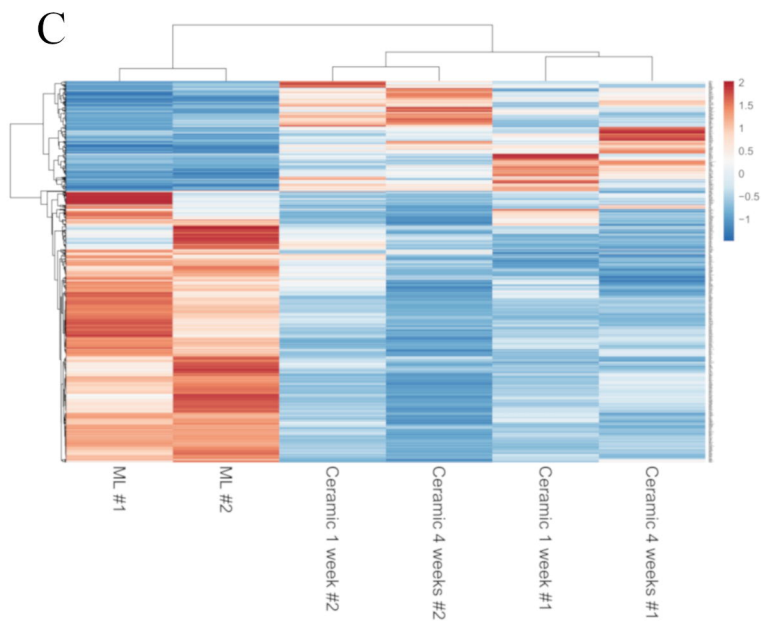

A

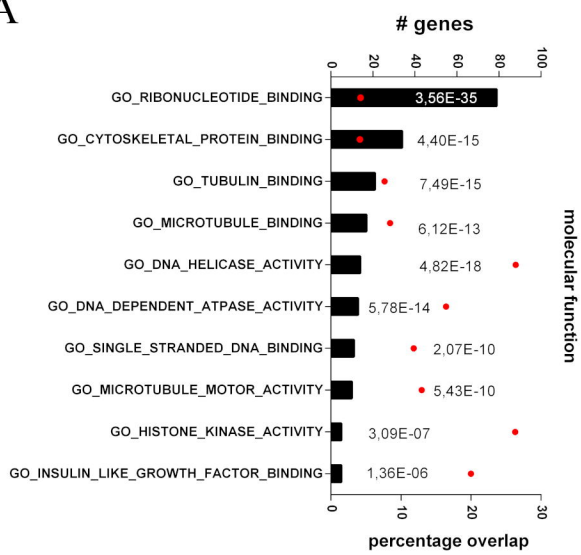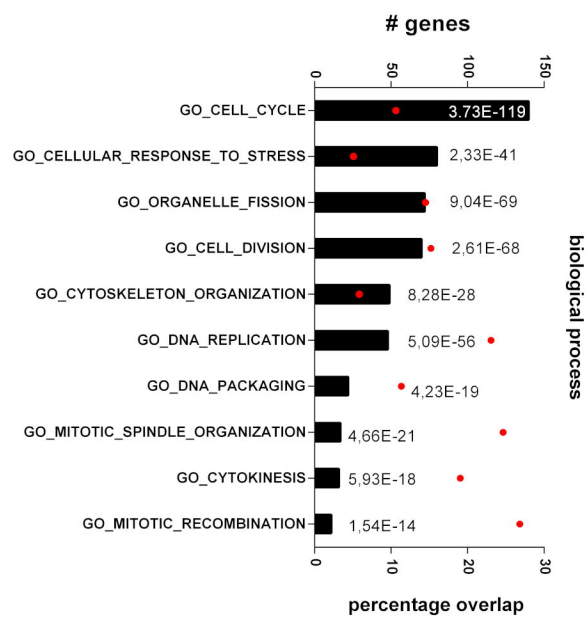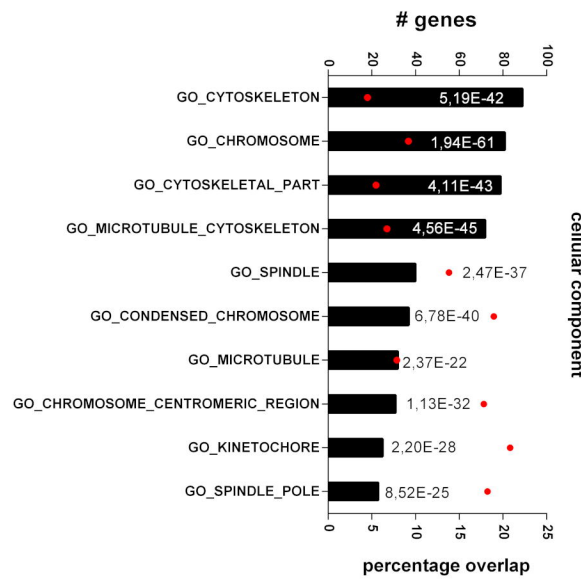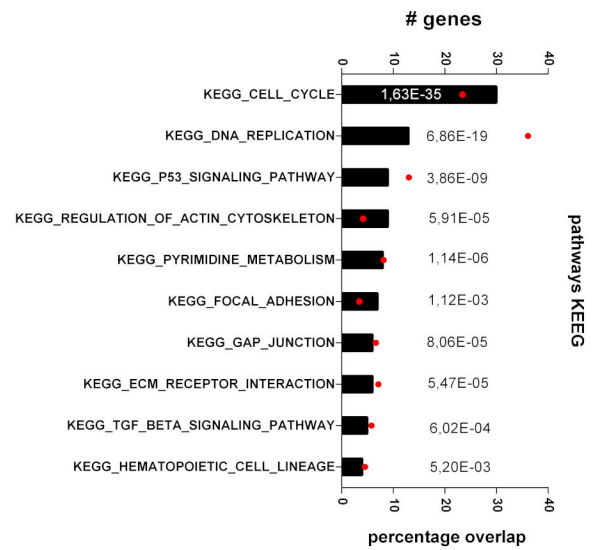

B

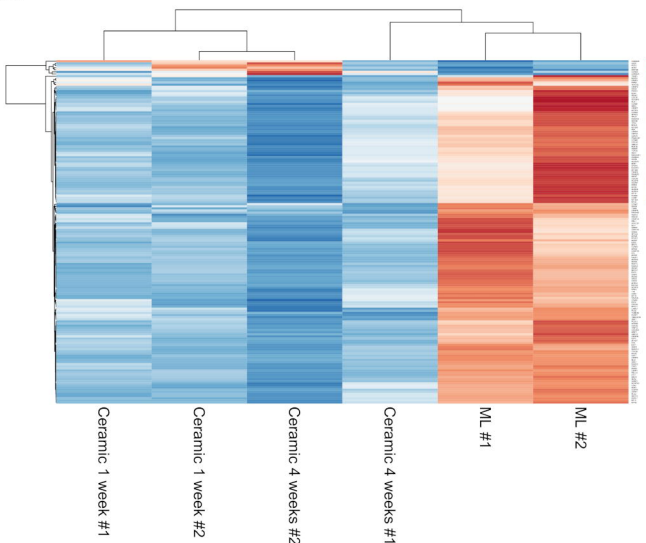

C

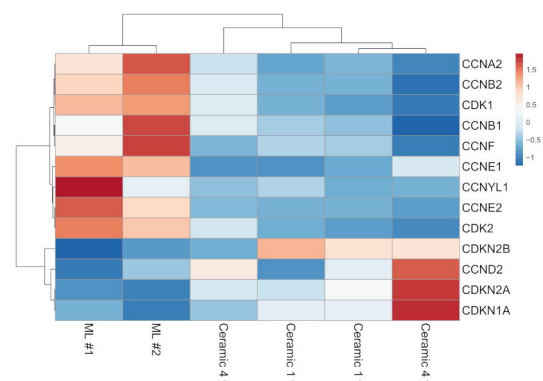



A

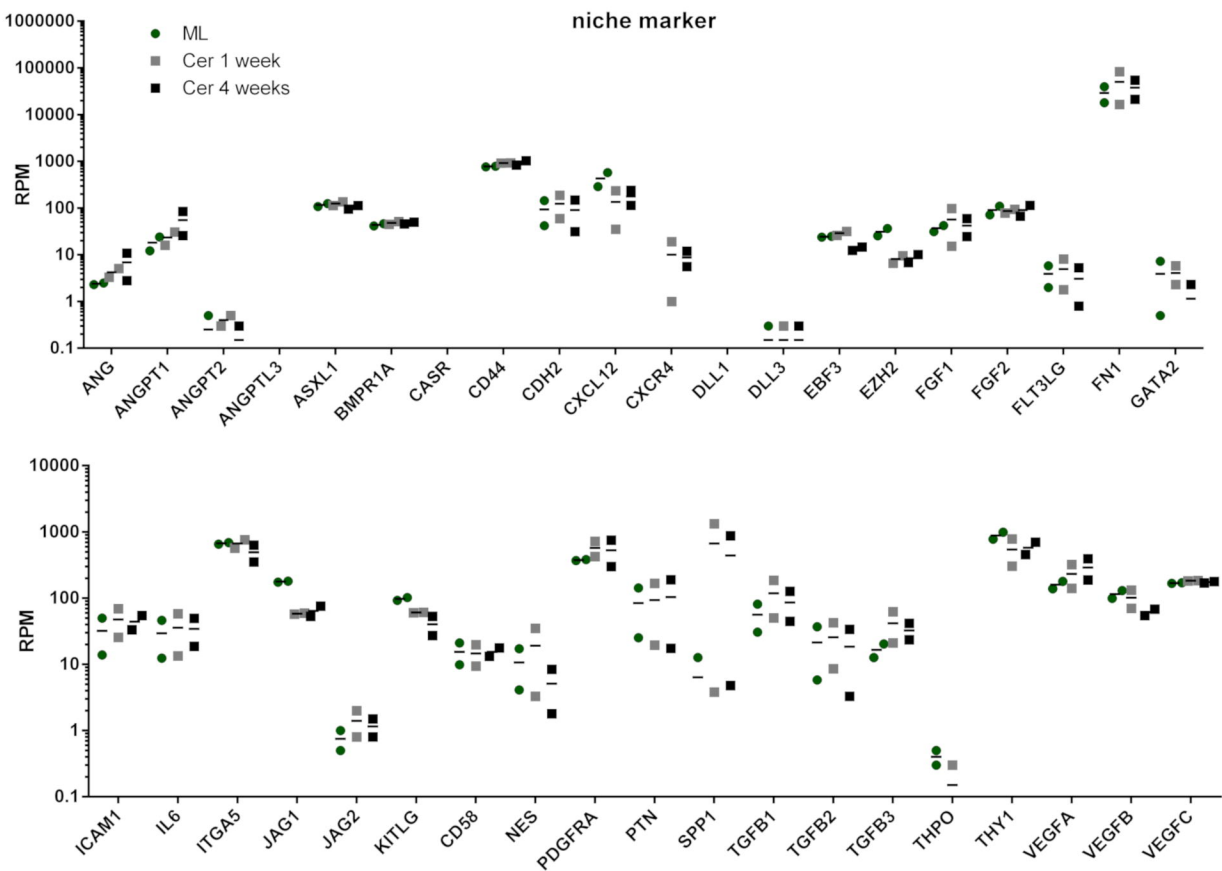

B

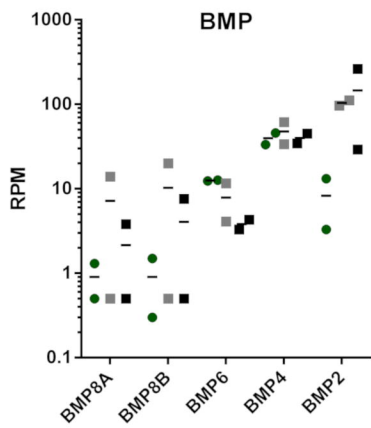

C

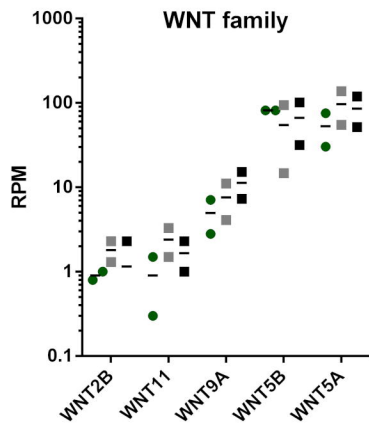

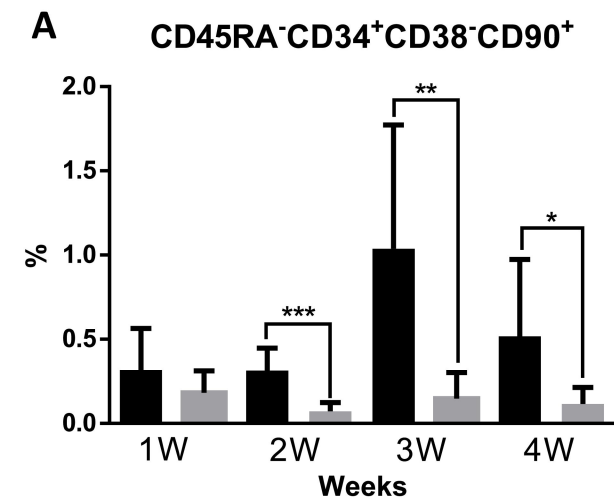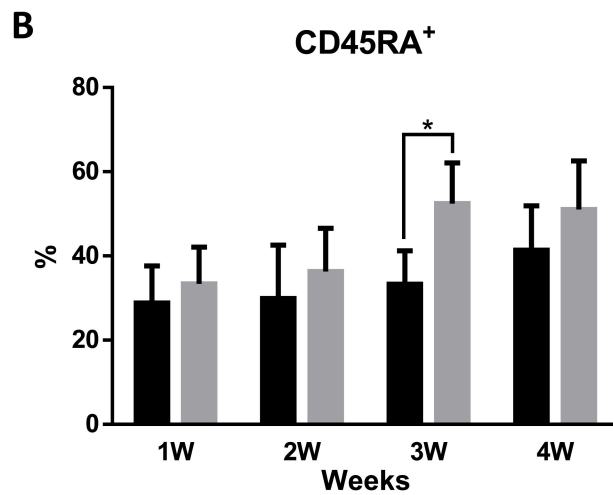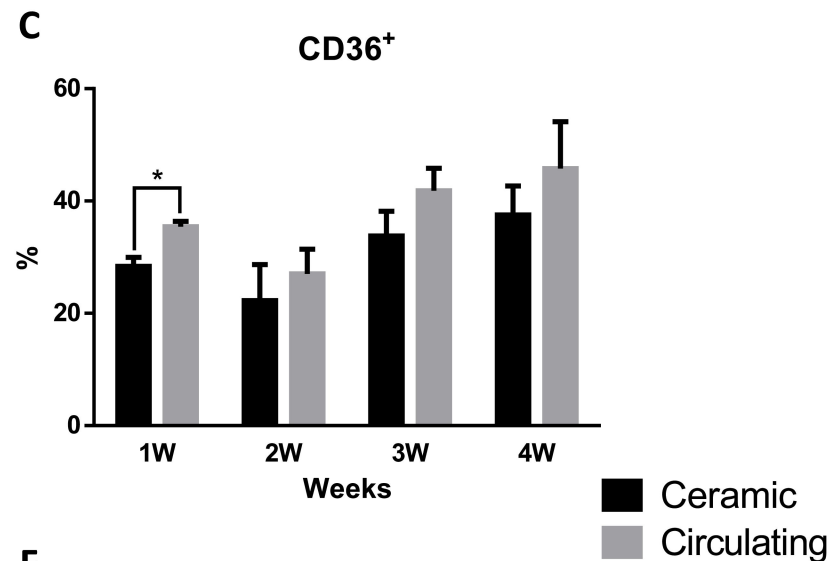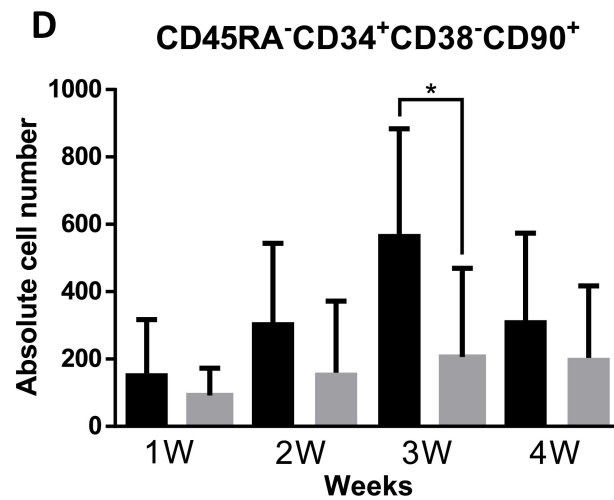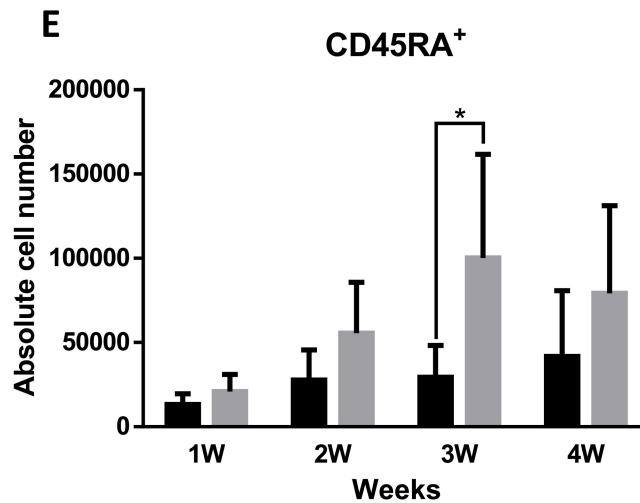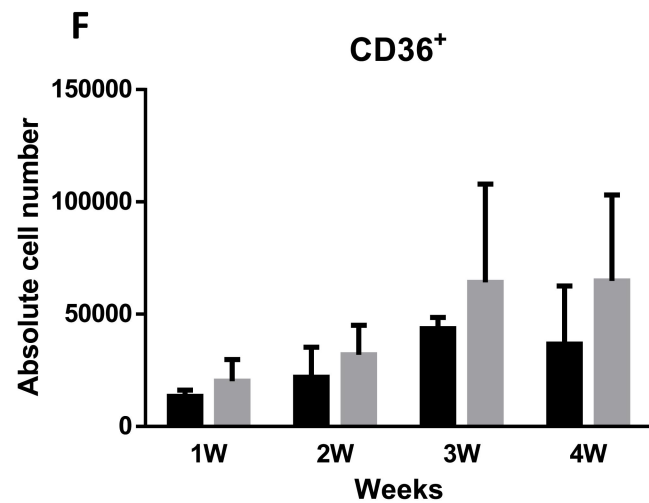

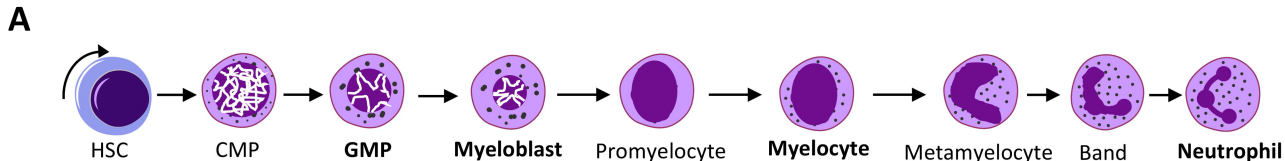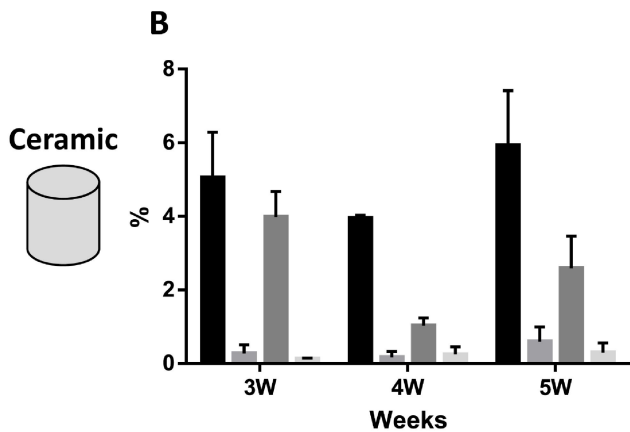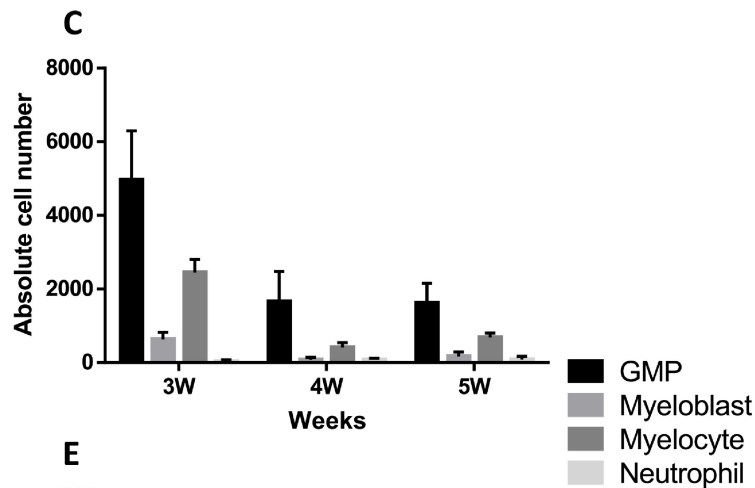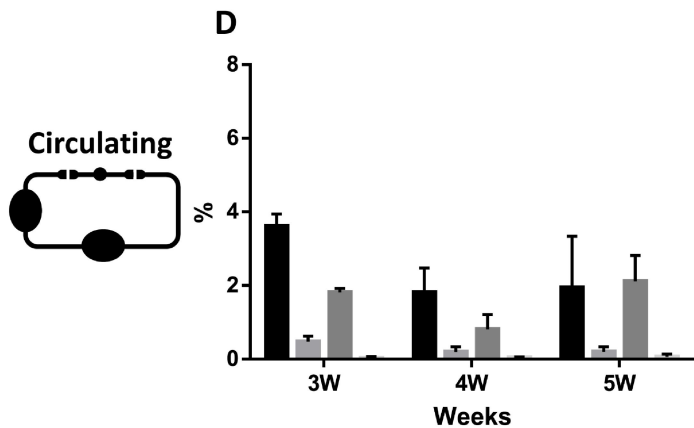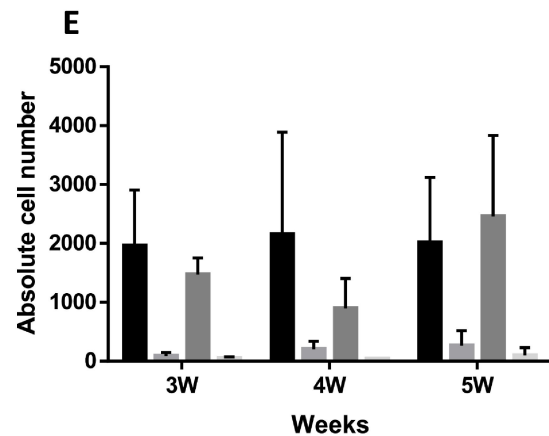

# CD34<sup>+</sup>CD38<sup>-</sup> Cells

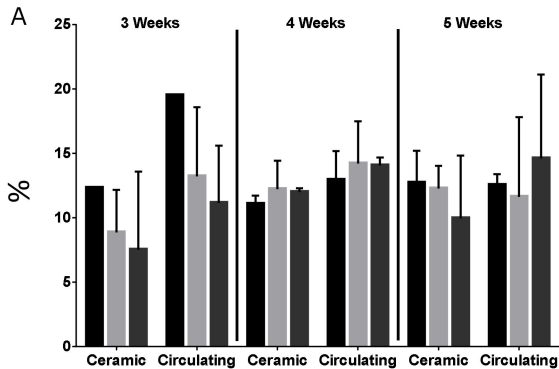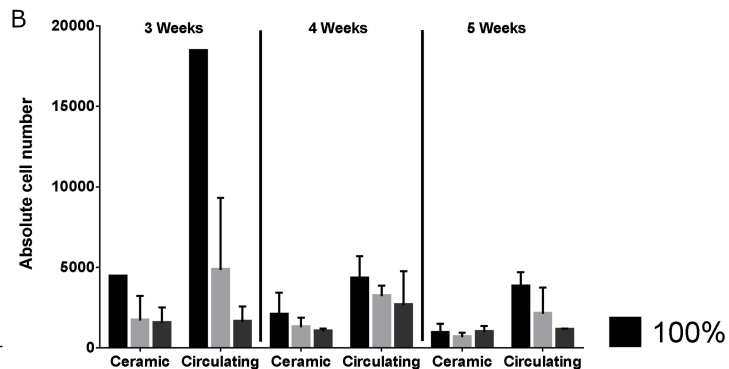

# CD45RA<sup>-</sup>CD34<sup>+</sup>CD38<sup>-</sup>CD90<sup>+</sup> Cells

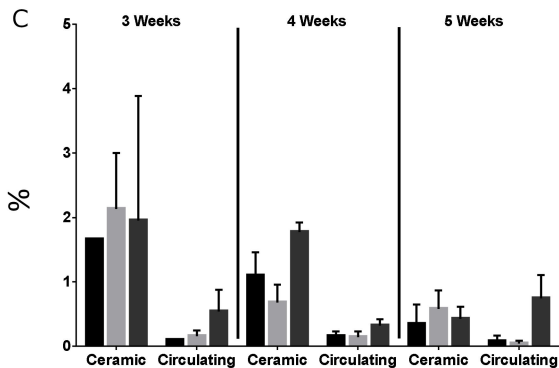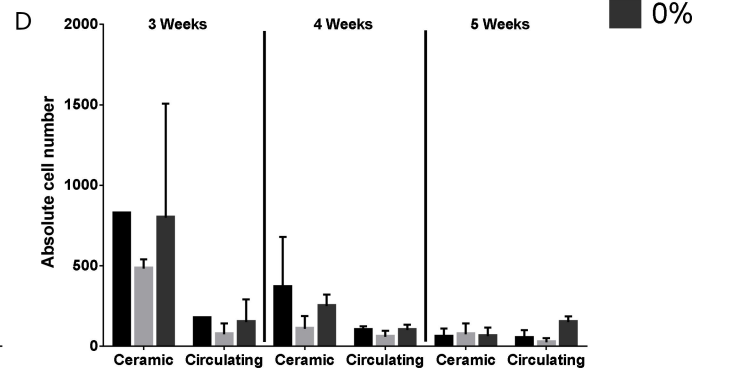

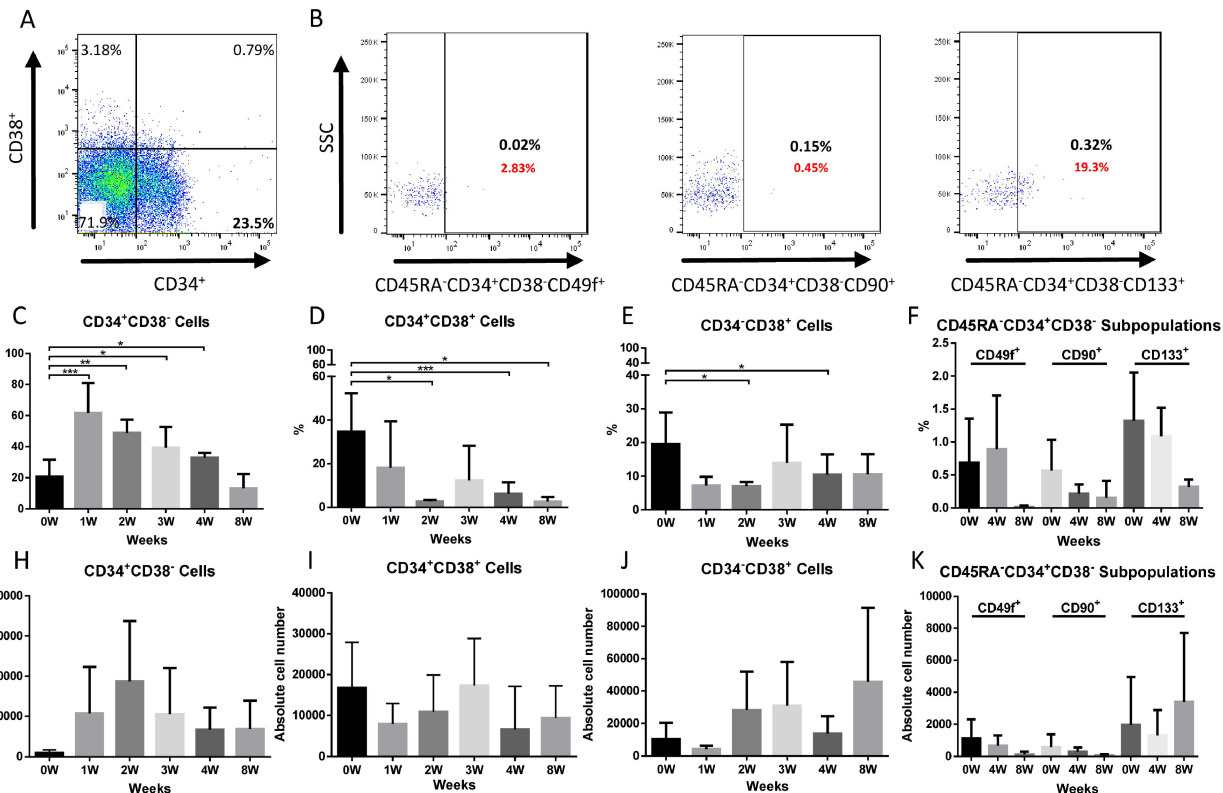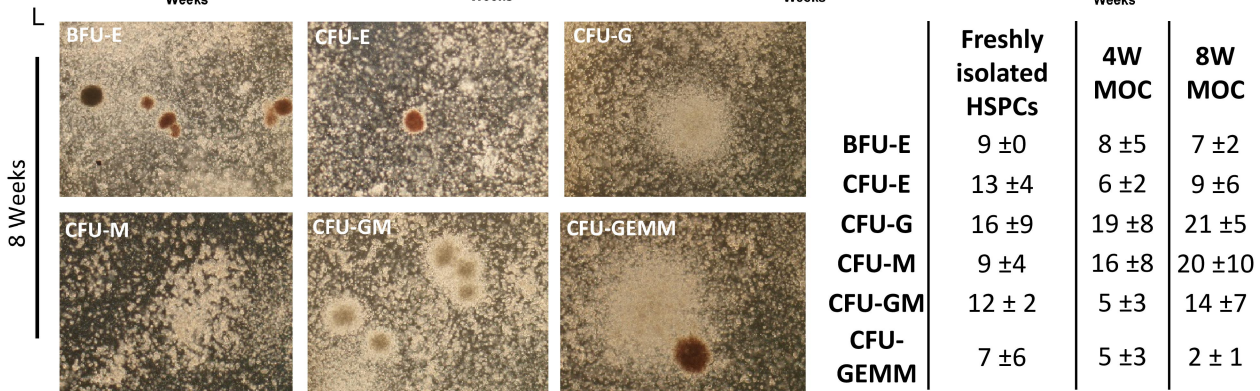

## 4 Week MOC Culture

## 8 Week MOC Culture

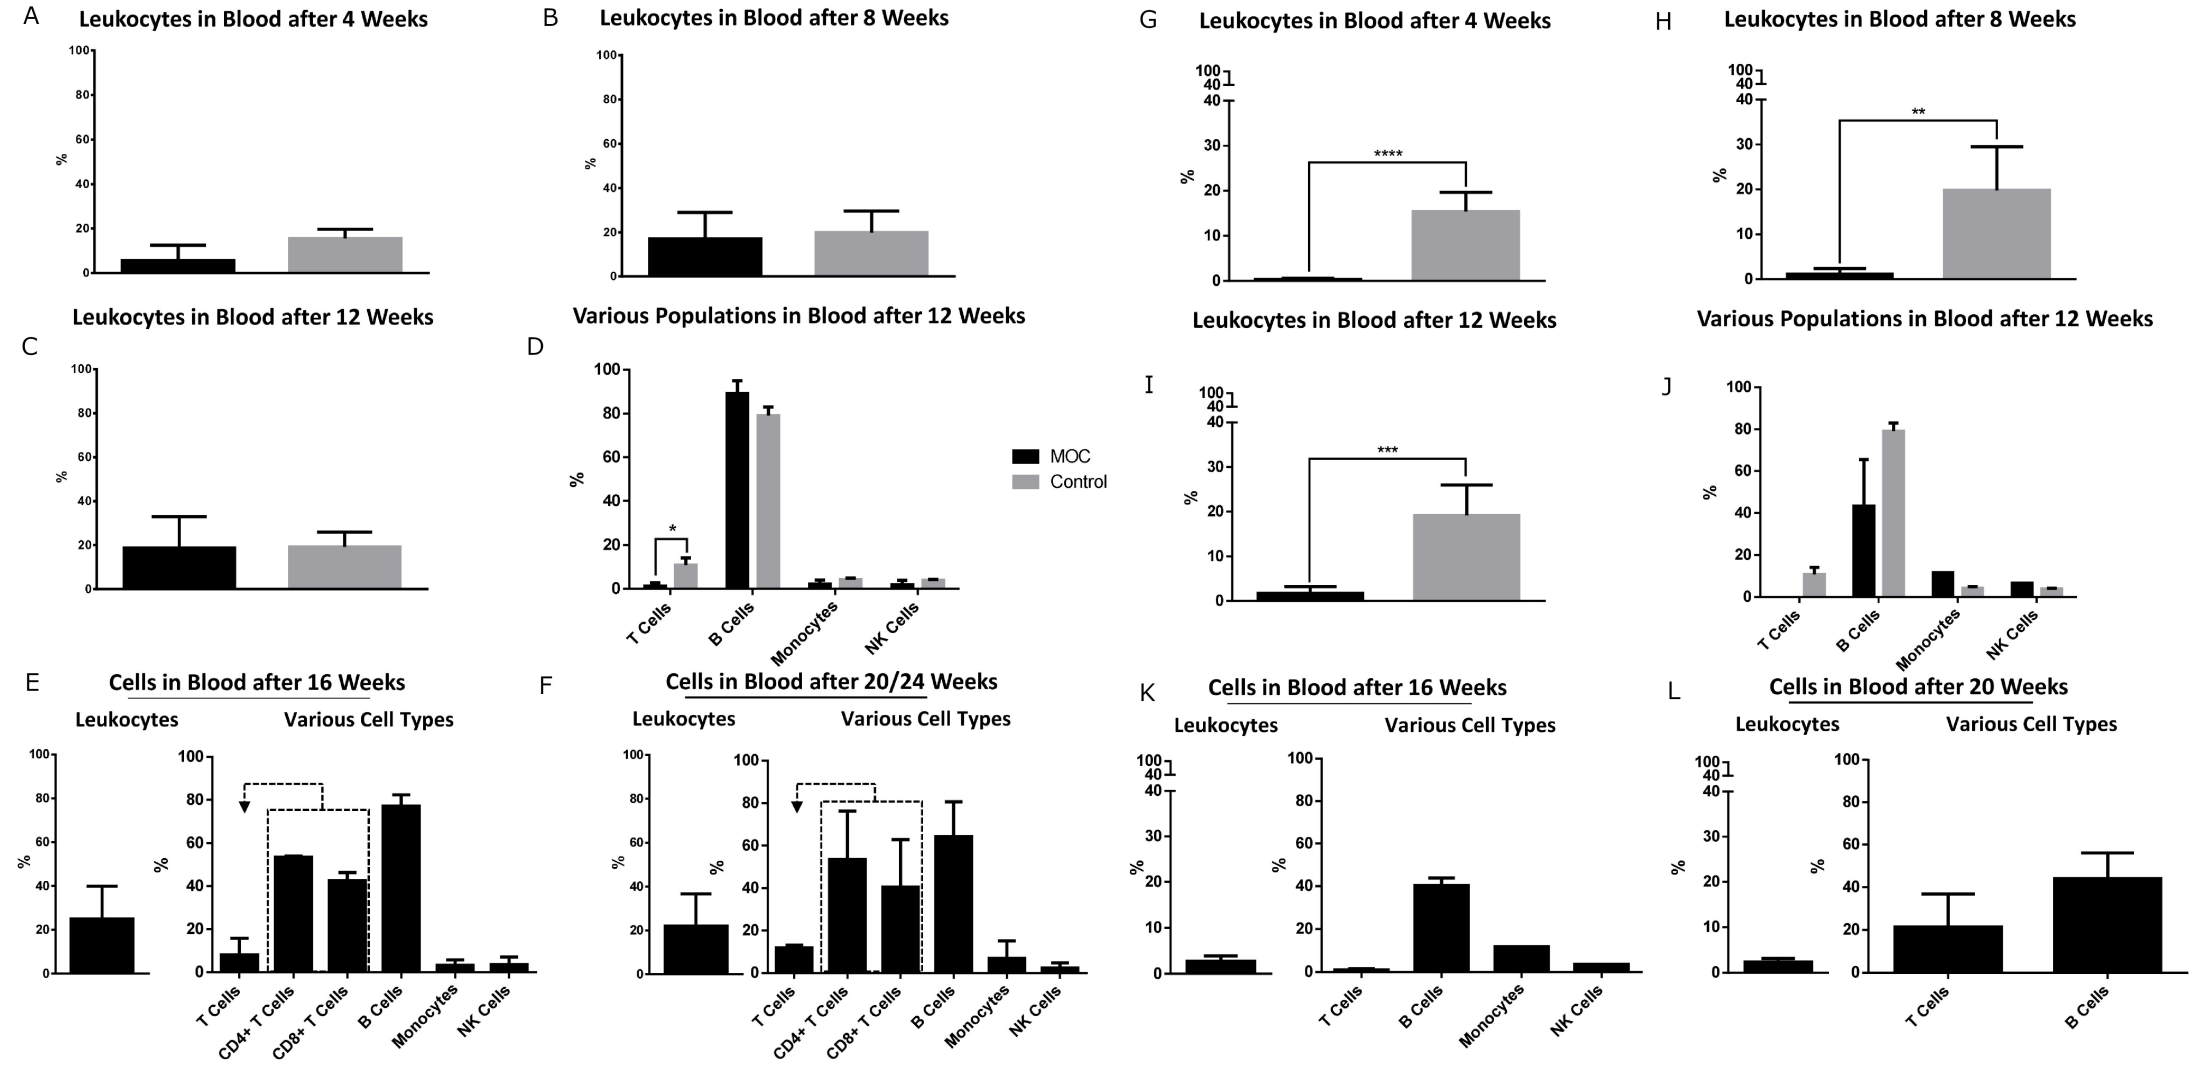

Source: http://biorxiv.org/content/10.1101/469528v1.full.pdf
